# Supplementary material
Source: PubMed Central journal article supplement (PMC6620404)
Supplement: JB.00192-19-s0001.pdf [file JB.00192-19-s0001.pdf]

## Supplementary Material

### Supplementary Results

Magnesium and iron. The cellular iron content was unchanged in all of the studied mutants. The cellular magnesium content was unaltered in the CH34, AE104,  $\Delta zupT$  and  $\Delta zur$  mutants (Suppl. Table S3); however, the number of cell-bound magnesium atoms was nearly 4-fold increased in the  $\Delta e4$  strain as published (1). While an additional  $\Delta zupT$  deletion did not alter this increased content (1), deletion of *zur* or any *cobW* decreased the Mg content back to the wild type level (Suppl. Table S2). In the absence of the four metal efflux systems ZntA, CadA, DmeF and FieF, all three CobWs were required to maintain a cellular magnesium level of about 10 million atoms per cell.

Cadmium resistance. In liquid TMM, the  $IC_{50}$  of strain CH34 was only about 100  $\mu M$  (Suppl. Table S2) and much lower than the MIC on solid medium (Table 2). As published (2), the influence of the plasmids on cadmium resistance was lower in liquid medium than on agar. Cadmium resistance in liquid medium decreased with a  $\Delta W2 \Delta W3$  deletion in strains CH34 and AE104,  $\Delta W1$ -cluster in AE104, deletion of *zupT*, of the four efflux systems in  $\Delta e4$ , or by most additional deletions in the  $\Delta e4$  strain (Suppl. Table S2), indicating a role of all these factors in cadmium resistance. Cadmium resistance even increased in the CH34  $\Delta W1$ -cluster  $\Delta W3$  double and the  $\Delta W1$ -cluster  $\Delta W2 \Delta W3$  triple mutant, AE104  $\Delta zur$  compared to AE104, and AE104  $\Delta zupT \Delta W1$ -cluster compared to AE104  $\Delta zupT$  (Suppl. Table S2). In AE104  $\Delta zupT$ , this increase in the  $\Delta W1$ -cluster mutant was CobW3-dependent because it was absent in the  $\Delta W1$ -cluster  $\Delta W3$  double mutant and, as in the case of zinc resistance, linked to the considered action of CobW3 on the activity of metal uptake systems. In the case of the  $\Delta zur$  mutant, the  $\Delta W1$ -cluster or  $\Delta W3$  single deletions did not alter cadmium resistance again but cadmium resistance of the three  $\Delta zur \Delta W$  double mutants and the  $\Delta W2$  single mutant was not different from that of the parent strain AE104. Increased cadmium resistance, supposedly by enhanced zinc-handling abilities, needed up-regulation of *zupT* and CobW2 or CobW1 plus CobW3. The very low cadmium resistance level of the  $\Delta e4$  strain (22  $\mu M$ ) decreased even further with  $\Delta W$  deletions (Suppl. Table S2) with the lowest cadmium resistance levels reached (1.6  $\mu M$ ) by the  $\Delta e4 \Delta W1$ -cluster,  $\Delta e4 \Delta W3$ , the  $\Delta e4 \Delta zupT \Delta W3$ , the  $\Delta e4 \Delta zur$  and the  $\Delta e4 \Delta zur \Delta W2$  mutants, indicating that the full set of CobWs was able to protect the cell against cadmium even in the absence of efflux systems. In contrast to the effect of the  $\Delta zupT$  deletion in

the strain AE104, a resistance decrease by 2/3, deletion of *zupT* did not decrease cadmium resistance of  $\Delta e4$  further so that the efflux systems plus the Zur regulon components were able to handle the imbalanced metal ion uptake that results in part from the *zupT* deletion (1).

While the plasmid pMOL30 with the *czc* determinant, and CobW2 were needed for high-level cadmium resistance (MIC 2.2 mM, Table 2) on solid growth medium, resistance to cadmium in liquid culture ( $IC_{50} = 0.1$  mM, Suppl. Table S2) required the four chromosomal efflux systems, most probably CadA and ZntA, and additionally the complete Zur regulon components ZupT plus the three CobWs. Controlled import of zinc, its cytoplasmic handling by the CobWs, and controlled efflux by ZntA and CadA was important for the cells to reach full cadmium resistance.

Nickel. Deletion of *cobW2* or of the *cobW1* cluster but not of *cobW3* increased the cellular nickel content in the CH34 background (Suppl. Table S4). The nickel content of the CH34  $\Delta W1$ -cluster  $\Delta W2$  mutant was higher than that of the two  $\Delta W1$ -cluster and  $\Delta W2$  single mutants and that of the  $\Delta W2$  mutant higher than that of the  $\Delta W1$ -cluster mutant. CobW2 and to some degree the CobW1 system controlled the cellular nickel content in strain CH34. The cellular nickel content was not much affected in strains AE104 or  $\Delta zupT$ , decreased in some  $\Delta zur$  mutants and all  $\Delta e4$  mutants. CobW2 and the CobW1 system were only required for control of the cytoplasmic nickel content in the presence of the plasmid-encoded metal resistance factors.

The  $\Delta W3$  deletion, which did not change the cellular nickel content, decreased the  $IC_{50}$  for nickel (2.6 mM) in CH34 strains by half (Suppl. Table S2). Loss of the plasmids decreased the nickel resistance of the resulting strain AE104 down to 226  $\mu$ M (Suppl. Table S2) and now the  $\Delta W3$  deletion had no effect. Loss of *zupT* or of *zur* decreased nickel resistance of strain AE104 only slightly but again, additional loss of CobW3 decreased nickel resistance by half. Loss of the four efflux systems, in this case mainly DmeF, decreased nickel resistance of AE104 to 25  $\mu$ M and each  $\Delta W$  deletion decreased it further. The lowest nickel resistance of all tested strain with  $IC_{50} = 3.7$   $\mu$ M displayed the strain  $\Delta e4 \Delta zupT \Delta W2, \Delta W3$ .

This indicated the importance of all CobWs but especially of CobW3 in nickel resistance. Since the  $\Delta W3$  mutant displayed no altered cellular nickel content, nickel toxicity was not connected to increased nickel accumulation but rather to enhanced toxicity of the nickel ions present in the cell. Because the cellular iron content was unchanged, the 4,000 cell-bound nickel

ions may have interfered with the metabolism of the 64,000 zinc atoms or 1,200 cobalt atoms per cell in the absence of CobW3.

Cobalt. Deletion of *cobW2* or of the  $\Delta cobW1$  cluster, which both led to an increased nickel level, decreased the cellular cobalt in the CH34 background (Suppl. Table S4). A  $\Delta W3$  deletion also caused no change in the cobalt content of strain CH34. In most of the AE104 derivatives, the cobalt content was increased but to a lower extent in AE104  $\Delta zur$   $\Delta W$  mutants. The cobalt content was back to the wild type level of strain CH34 in the  $\Delta e4$   $\Delta zur$   $\Delta W2$  mutant, indicating that the plasmid-encoded and chromosomal efflux systems, the CobW1 system and especially CobW2 were also involved in control of the cellular cobalt level.

The  $IC_{50}$  of 1.5 mM Co(II) of strain CH34 decreased with the  $\Delta W3$  deletion but no other single  $\Delta W$  deletion (Suppl. Table S2), increased to 2.2 mM with an additional  $\Delta W1$ -cluster deletion and went back to the parent strain level in the  $\Delta W1$ -cluster  $\Delta W2$   $\Delta W3$  triple mutant of strain CH34. While CobW3 was the major player in nickel resistance of strain CH34, the  $\Delta W3$  deletion in strain CH34 caused the interference of CobW2 and the CobW1 system, which was evident in EDTA resistance, to appear also in cobalt resistance.

The  $IC_{50}$  for Co(II) decreased with loss of the plasmids in strain AE104 to 135  $\mu$ M, further down to 85  $\mu$ M in strain AE104  $\Delta zur$  and to 4.7  $\mu$ M in the  $\Delta e4$  mutant (Suppl. Table S2). It was not influenced by the  $\Delta zur$  deletion. All  $\Delta W$  double mutants of strains AE104, AE104  $\Delta zur$  and AE104  $\Delta zur$  displayed a decreased cobalt resistance level compared to their respective parent strains. Of the single mutants,  $\Delta W1$ -cluster decreased cobalt resistance in strain AE104,  $\Delta W2$  and  $\Delta W3$  but not  $\Delta W1$ -cluster in AE104  $\Delta zur$ , indicating a function of the three CobWs in cobalt resistance. The  $\Delta e4$   $\Delta zur$   $\Delta W2$   $\Delta W3$  mutant with an  $IC_{50}$  of 1.6  $\mu$ M had the lowest cobalt resistance level of all tested strains (Suppl. Table S2).

As in the case of nickel, the decrease of cobalt resistance in the  $\Delta W$  mutant strains was not connected to a reciprocal increase in cell-bound cobalt but instead should have been mediated by an increased toxicity of the cobalt ions already present in the cell. This indicated that a main function of the three CobWs might be to shield the cellular zinc homeostasis against the competing ions Co(II), Ni(II) and Cd(II), although a role in cobalt and nickel homeostasis could not be excluded at this stage.

Expression of genes for efflux systems in  $\Delta cobW3$  mutant strains. CobW3 seems to control metal accumulation under certain conditions. This could occur at the transcriptional or post-transcriptional level, and at the level of uptake or efflux systems. To examine the effect of CobW3 on the expression of the genes for the four metal efflux systems deleted in the  $\Delta e4$  mutant, *lacZ*-fusions were constructed with the genes *zntA*, *cadA*, *dmeF*, and *fieF* in CH34, AE104, AE104  $\Delta zupT$ , and its respective  $\Delta cobW3$  mutants.

The basic expression level of *zntA* for the main zinc-exporting inner membrane efflux system was twice as high in AE104 as in CH34, probably because the plasmid-encoded *czc* system was absent (Suppl. Table S5). This level decreased by half with the  $\Delta zupT$  deletion, appeared to increase again with the  $\Delta W3$  deletion but the values  $37.4 \pm 7.5$  and  $50.7 \pm 8.4$  U/mg were not significantly different from each other. There was also no difference between the EDTA-, zinc-, or cadmium-induced up-regulation of *zntA-lacZ* in the presence or absence of *cobW3*. Only in strain AE104  $\Delta zupT$ , additional deletion of *cobW3* caused a stronger cobalt-induced up-regulation of *zntA-lacZ* (Suppl. Table S5). CobW3 had no influence of *zntA* expression except that CobW3 was required to quench a cobalt-dependent gratuitous induction of *zntA* in strain AE104  $\Delta zupT$ .

The basic expression level of *cadA-lacZ* was down-regulated by the  $\Delta W3$  deletion in strains CH34 and AE104 but not in AE104  $\Delta zupT$  (Suppl. Table S5). The presence of cadmium compensated this effect, so that the cells did not suffer from decreased cadmium resistance (Suppl. Table S2). The influence of CobW3 on expression of *dmeF* was very small, and absent in the case of *fieF*, which encodes the Fe(II) efflux pump FieF (3, 4). Together, CobW3 influenced the expression of genes of metal efflux systems only to a small degree, however, some interaction at the post-transcriptional, -translational, activity level or delivery of surplus zinc to these exporters could not be ruled out. Since absence of CobW3 also increased the zinc content of the  $\Delta e4 \Delta zupT$  mutant, which had no metal efflux systems, no ZupT but at least 9 other zinc uptake systems, CobW3 may interfere with metal uptake by these remaining metal import systems of *C. metallidurans*.

Expression of genes for metal import systems in  $\Delta cobW3$  mutant strains. Ranked by the activity of the *lacZ*-fusions in AE104 cells grown in unamended medium, the expression levels of the 9 metal

importers in this strain should be PitA >> CorA1 > CorA2 > CorA3 >> ZupT > MgtB > ZntB > MgtA >>> HoxN, with the latter not being expressed in strain AE104 ( $0.87 \pm 1.68$  U/mg, Suppl. Table S6). In addition to HoxN, in strain CH34 ZntB, CorA3 and MgtA were also repressed (Suppl. Table S6, areas in grey fields), so that the wild-type strain should use only 5 of the 9 known importers, PitA for metal-phosphate uptake, CorA1, CorA2 for divalent metal cations including  $Mg^{2+}$ , ZupT and the MgtB  $Ca^{2+}/Mg^{2+}$  P-type ATPase (5, 6).

The MIT protein ZntB was activated in AE104 and even more in its  $\Delta zupT$  mutant, and repressed by zinc in these strains (Suppl. Table S6). CobW3 was responsible for the complete repression of *zntB-lacZ* in strain CH34. Expression of *zupT*, *pitA*, *corA2*, *mgtA* or *mgtB* was not influenced by CobW3. As in the case of *zntB*, repression of *corA3* in strain CH34 was ameliorated in the CH34  $\Delta W3$  mutant. Expression of *corA1* in the  $\Delta zupT$  strain was strongly repressed by zinc but not so in the  $\Delta zupT \Delta W3$  mutant, while the gene was strongly repressed by EDTA in the  $\Delta zupT \Delta W3$  mutant compared to the  $\Delta zupT$  parent or the other strains. CobW3 was needed to repress ZntB and CorA3 in CH34, for a zinc-dependent repression of *corA1* in the absence of *zupT*, and for an EDTA-dependent expression of *corA1* in the same strain (Suppl. Table S6).

Since the CorA systems are known since a long time to be involved in cobalt import (7, 8), the influence of CobW3 on the metal content of cobalt-treated cells was analyzed. As in the presence of zinc and EDTA, the Mg content of the  $\Delta e4$  mutant was increased but was reduced back down to the AE104 parent level again when *cobW3* was deleted. This also occurred in the  $\Delta e4 \Delta zupT$  mutant (Suppl. Table S7). The phosphate content was also elevated by more than 50%. Otherwise, strain AE104 treated with 25  $\mu M$   $CoCl_2$  contained more Co per cell than CH34, as expected in the absence of the cobalt efflux systems Czc and Cnr. A major difference in the absence of CobW3 was a significantly increased cellular cobalt content in the  $\Delta zupT$  strain, and a decreased nickel and even iron content, with the iron content of cobalt-treated  $\Delta zupT \Delta W3$  cells not different from the  $\Delta zupT$  parent cells. Consequently, the missing repression of *corA1* in the  $\Delta zupT$  strain (Suppl. Table S6) coincided by an increased cellular cobalt and decreased nickel content (Suppl. Table S7) in cobalt-treated but not in zinc-, EDTA- or un-treated cells (Suppl. Table S4), reversion of the decreased zinc content of  $\Delta zupT$  cells (Table 2), and a decreased cobalt and nickel resistance (Suppl. Table S2).

**Supplementary Table S1. RT-PCR Results<sup>a</sup>**

| Primer pair       | Position         | %DNA        | Description           |
|-------------------|------------------|-------------|-----------------------|
| <u>zur-region</u> |                  |             |                       |
| Gene position     | <u>1149-1658</u> |             | <u>zur gene</u>       |
| a                 | 1166-1427        | 6.6%±6.3%   | zur internal          |
| 7                 | 1354-1708        | 7.7%±9.0%   | zur-cobW2             |
| Gene position     | <u>1709-2800</u> |             | <u>cobW2 gene</u>     |
| 9                 | 1354-1988        | 1.6%±1.2%   | zur-cobW2             |
| 10                | 1354-2425        | 1.3%±0.9%   | zur-cobW2             |
| 8                 | 1659-1988        | 29.5%±14.5% | zur-cobW2             |
| b                 | 2128-2425        | 81.6%±10.7% | cobW2 internal        |
| 17                | 2128-3564        | 0.6%±0.6%   | cobW2-dksA1           |
| 3                 | 2128-3118        | 19.4%±9.9%  | cobW2-dksA1           |
| 24                | 2532-3328        | 9.8%±4.5%   | cobW2-dksA1           |
| 1                 | 2801-3118        | 71.1%±10.0% | cobW2-dksA1           |
| 2                 | 2801-3564        | 0.8%±1.0%   | cobW2-dksA1           |
| Gene position     | <u>3119-3808</u> |             | <u>dksA1 gene</u>     |
| c                 | 3287-3564        | 30.3%±14.6% | dksA1 internal        |
| 6                 | 3287-4147        | 2.1%±3.4%   | dksA1-cobW3           |
| 4                 | 3669-4147        | 2.6%±3.0%   | dksA1-cobW3           |
| 5                 | 3809-4603        | 2.7%±2.8%   | dksA1-cobW3           |
| Gene position     | <u>4001-5176</u> |             | <u>cobW3 gene</u>     |
| d                 | 4300-4603        | 5.1%±2.3%   | cobW3 internal        |
| 19                | 4300-5487        | 0.2%±2.2%   | cobW3-Rmet_0124       |
| 25                | 4835-5487        | 3.6%±1.6%   |                       |
| Gene position     | <u>5166-5564</u> |             | <u>Rmet_0124 gene</u> |
| 18                | 5176-5487        | 5.1%±3.5%   | Rmet_0124 internal    |

cobW1-region

|               |                    |             |                                          |
|---------------|--------------------|-------------|------------------------------------------|
| 14            | 9616-10000         | 2.5%±1.6%   | <i>cobW1</i> upstream                    |
| 15            | 9616-10717         | 0.4%±1.8%   | <i>cobW1</i> upstream                    |
| 26            | 9735-10000         | 5.5%±3.8%   | <i>cobW1</i> upstream                    |
| 27            | 9735-10717         | 1.8%±0.6%   | <i>cobW1</i> upstream                    |
| Gene position | <u>10001-11194</u> |             | <u><i>cobW1</i> gene</u>                 |
| <i>a</i>      | 10364-10717        | 83.8%±9.9%  | <i>cobW1</i> internal                    |
| 16a           | 10364-11212        | 31.0%±5.6%  | <i>cobW1-foIEIB2</i>                     |
| 16            | 10364-11561        | 2.1%±1.4%   | <i>cobW1-foIEIB2</i>                     |
| 12            | 10922-11561        | 17.0%±3.9%  | <i>cobW1-foIEIB2</i>                     |
| Gene position | <u>11210-12184</u> |             | <u><i>foIEIB2</i> gene</u>               |
| <i>b</i>      | 11195-11561        | 79.0%±1.5%  | <i>foIEIB2</i> internal                  |
| 28            | 11889-12495        | 48.2%±32.3% | <i>foIEIB2-cycS</i>                      |
| Gene position | 12181-13599        |             | <u><i>cysS</i> gene <i>Rmet_1100</i></u> |
| 11            | 12178-12495        | 87.7%±3.4%  | <i>foIEIB2-cycS</i>                      |
| 13            | 12495-11195        | 10.3%±9.1%  | <i>foIEIB2-cycS</i>                      |
| 20            | 13324-13913        | 6.8%±2.4%   | <i>cycS-Rmet_1101</i>                    |
| Gene position | <u>13609-14190</u> |             | <u><i>Rmet_1101</i> gene</u>             |
| 21            | 13880-14505        | 69.8%±13.8% | <i>Rmet_1101-Rmet_1102</i>               |
| Gene position | <u>14210-14770</u> |             | <u><i>Rmet_1102</i> gene</u>             |
| 22            | 14473-15144        | 12.1%±5.6%  | <i>Rmet_1102-Rmet_1103</i>               |
| Gene position | <u>14828-16225</u> |             | <u><i>allB</i> gene <i>Rmet_1103</i></u> |
| 23            | 15923-16587        | -0.2%±3.8%  | <i>Rmet_1103-Rmet_1104</i>               |
| Gene position | 16291-18477        |             | <u><i>Rmet_1104</i> (other strand)</u>   |

<sup>a</sup>RNA was isolated and reverse-transcribed using random priming. The resulting cDNA was amplified by PCR. The product was visualized on an agarose gel with ethidium bromide with DNA as positive and water as negative control. All bands were scanned using ImageJ (9), the gel background intensity directly above the band subtracted and the signal value of the negative water control subtracted. The resulting value was divided by the signal value of the positive DNA control. Three biological repeats, mean %DNA value with deviations shown. No RT-PCR was done for *Rmet\_1104* on the other DNA strand.

**Supplementary Table S2. Metal resistance of mutant strains in liquid culture**

| Bacterial strain                                      | % IC <sub>50</sub> values |                   |                   |                   |                   |
|-------------------------------------------------------|---------------------------|-------------------|-------------------|-------------------|-------------------|
|                                                       | EDTA                      | ZnCl <sub>2</sub> | NiCl <sub>2</sub> | CoCl <sub>2</sub> | CdCl <sub>2</sub> |
| CH34                                                  | 100%                      | 100%              | 100%              | 100%              | 100%              |
| CH34 $\Delta$ W1-cluster                              | 145%                      | 105%              | 81%               | 107%              | 123%              |
| CH34 $\Delta$ W2                                      | 60%                       | 100%              | 73%               | 100%              | 125%              |
| CH34 $\Delta$ W3                                      | 100%                      | 95%               | 50%               | 67%               | 103%              |
| CH34 $\Delta$ W1-cl. $\Delta$ W2                      | 103%                      | 85%               | 69%               | 93%               | 119%              |
| CH34 $\Delta$ W1-cl. $\Delta$ W3                      | 142%                      | 105%              | 65%               | 147%              | 141%              |
| CH34 $\Delta$ W2 $\Delta$ W3                          | 75%                       | 80%               | 65%               | 53%               | 44%               |
| CH34 $\Delta$ W1-cl. $\Delta$ W2 $\Delta$ W3          | 107%                      | 65%               | 58%               | 100%              | 146%              |
| AE104                                                 | 53%                       | 25%               | 8.7%              | 9.0%              | 116%              |
| AE104 $\Delta$ W1-cluster                             | 47%                       | 100%              | n.d.              | 65%               | 51%               |
| AE104 $\Delta$ W2                                     | 75%                       | 120%              | n.d.              | 92%               | 100%              |
| AE104 $\Delta$ W3                                     | 128%                      | 120%              | 123%              | 95%               | 96%               |
| AE104 $\Delta$ W1-cl. $\Delta$ W3                     | 19%                       | 100%              | 78%               | 50%               | 91%               |
| AE104 $\Delta$ W2 $\Delta$ W3                         | 84%                       | 100%              | 96%               | 40%               | 61%               |
| $\Delta$ zupT                                         | 56%                       | 27%               | 72%               | 63%               | 34%               |
| $\Delta$ zupT $\Delta$ W1-cl.-cluster                 | 267%                      | 115%              | n.d.              | 106%              | 185%              |
| $\Delta$ zupT $\Delta$ W2                             | 89%                       | 110%              | n.d.              | 42%               | 100%              |
| $\Delta$ zupT $\Delta$ W3                             | 83%                       | 110%              | 49%               | 20%               | 118%              |
| $\Delta$ zupT $\Delta$ W1-cl. $\Delta$ W3             | 33%                       | 96%               | 96%               | 35%               | 98%               |
| $\Delta$ zupT $\Delta$ W2 $\Delta$ W3                 | 72%                       | 100%              | 45%               | 31%               | 80%               |
| $\Delta$ zur                                          | 56%                       | 97%               | 86%               | 101%              | 135%              |
| $\Delta$ zur $\Delta$ W1-cluster                      | 106%                      | 106%              | 94%               | 99%               | 103%              |
| $\Delta$ zur $\Delta$ W2                              | 89%                       | 90%               | 92%               | 88%               | 78%               |
| $\Delta$ zur $\Delta$ W3                              | 72%                       | 106%              | 64%               | 74%               | 102%              |
| $\Delta$ zur $\Delta$ W1-cl. $\Delta$ W2              | 89%                       | 57%               | 79%               | 46%               | 84%               |
| $\Delta$ zur $\Delta$ W1-cl. $\Delta$ W3              | 78%                       | 92%               | 77%               | 57%               | 75%               |
| $\Delta$ zur $\Delta$ W2 $\Delta$ W3                  | 100%                      | 92%               | 96%               | 46%               | 78%               |
| $\Delta$ e4                                           | 53%                       | 1.5%              | 11%               | 3.5%              | 18%               |
| $\Delta$ e4 $\Delta$ W1-cluster                       | 88%                       | 70%               | 27%               | 98%               | 9.0%              |
| $\Delta$ e4 $\Delta$ W3                               | 88%                       | 74%               | 23%               | 100%              | 7.1%              |
| $\Delta$ e4 $\Delta$ W1-cl. $\Delta$ W2               | 94%                       | 70%               | 23%               | 98%               | n.d.              |
| $\Delta$ e4 $\Delta$ W1-cl. $\Delta$ W3               | 100%                      | 21%               | 23%               | 94%               | 67%               |
| $\Delta$ e4 $\Delta$ W2 $\Delta$ W3                   | 88%                       | 71%               | 19%               | 64%               | 14%               |
| $\Delta$ e4 $\Delta$ zupT                             | 112%                      | 75%               | 85%               | 87%               | 105%              |
| $\Delta$ e4 $\Delta$ zupT $\Delta$ cobW3              | 94%                       | 74%               | 54%               | 98%               | 8.1%              |
| $\Delta$ e4 $\Delta$ zupT $\Delta$ W1-cl. $\Delta$ W3 | 100%                      | 83%               | 81%               | 98%               | 11%               |



|                                             |     |            |            |             |             |
|---------------------------------------------|-----|------------|------------|-------------|-------------|
| $\Delta e4 \Delta zupT \Delta W2 \Delta W3$ | 94% | 72%        | <b>15%</b> | <b>34%</b>  | <b>13%</b>  |
| $\Delta e4 \Delta zur$                      | 94% | <b>62%</b> | 69%        | <b>157%</b> | <b>7.1%</b> |
| $\Delta e4 \Delta zur \Delta W2$            | 94% | <b>64%</b> | <b>62%</b> | 121%        | <b>7.6%</b> |

Metal resistance of mutants carrying a deletion of the complete *cobW1* cluster, of the *cobW3* gene, or disruptions (dis) of *cobW1* or *cobW2*, respectively, was tested in dose-response experiments and the IC (concentration of half-maximum growth inhibition) was calculated. These values were compared for: (i) CH34 mutants including the plasmid-free strain AE104 (shaded box) to CH34 wild type cells (bold box at the top line); (ii) AE104 mutants including  $\Delta zupT$ ,  $\Delta zur$  and  $\Delta e4$  ( $\Delta cadA \Delta zntA \Delta fieF \Delta dmeF$ )(boxes) to AE104 cells (shaded box); (iii) mutants of  $\Delta zupT$ ,  $\Delta zur$  and  $\Delta e4$  to these respective parents (boxes directly above). If  $D > 1$  ( $n > 3$ , deviation bars of the data points do not touch or overlap), an  $IC_{50}$  ratio  $< 67\%$  is in red, an  $IC_{50}$  ratio  $> 133\%$  in green. 100% values for CH34 cells TMM:  $6.0 \pm 1.13$  mM EDTA,  $2.0 \pm 0.1$  mM  $ZnCl_2$ ,  $2.6 \pm 0.2$  mM  $NiCl_2$ ,  $1.5 \pm 0.2$  mM  $CoCl_2$ ,  $103 \pm 9$   $\mu M$   $CdCl_2$ . n.d., not determined.

Supplementary Table S3. Mg and Fe content of mutant strains

| Addition<br>Bacterial strain                          | none        |             | 100 $\mu$ M EDTA |             | 10/100 $\mu$ M Zn |             |
|-------------------------------------------------------|-------------|-------------|------------------|-------------|-------------------|-------------|
|                                                       | Mg          | Fe          | Mg               | Fe          | Mg                | Fe          |
| CH34                                                  | <b>100%</b> | <b>100%</b> | <b>96%</b>       | <b>107%</b> | <b>99%</b>        | <b>99%</b>  |
| CH34 $\Delta$ W1-cluster                              | 88%         | 113%        | 84%              | 84%         | 79%               | 99%         |
| CH34 $\Delta$ W2                                      | 98%         | 108%        | 94%              | 84%         | 102%              | 112%        |
| CH34 $\Delta$ W3                                      | 94%         | 111%        | 94%              | 89%         | 103%              | 97%         |
| CH34 $\Delta$ W1-cl. $\Delta$ W2                      | 92%         | 140%        | 90%              | 98%         | 91%               | 122%        |
| CH34 $\Delta$ W1-cl. $\Delta$ W3                      | 92%         | 125%        | 103%             | 98%         | 92%               | 117%        |
| CH34 $\Delta$ W2 $\Delta$ W3                          | 85%         | 106%        | 97%              | 107%        | 92%               | 117%        |
| CH34 $\Delta$ W1-cl. $\Delta$ W2 $\Delta$ W3          | 92%         | 131%        | 97%              | 119%        | 90%               | 118%        |
| AE104                                                 | <b>97%</b>  | <b>121%</b> | <b>95%</b>       | <b>94%</b>  | <b>97%</b>        | <b>73%</b>  |
| AE104 $\Delta$ W1-cluster                             | 123%        | 83%         | 124%             | 89%         | 106%              | 62%         |
| AE104 $\Delta$ W2                                     | 102%        | 97%         | 115%             | 99%         | 112%              | 76%         |
| AE104 $\Delta$ W3                                     | 92%         | 77%         | 108%             | 104%        | 120%              | 108%        |
| AE104 $\Delta$ W1-cl. $\Delta$ W3                     | 96%         | 89%         | 101%             | 92%         | 115%              | 97%         |
| AE104 $\Delta$ W2 $\Delta$ W3                         | 97%         | 93%         | 101%             | 93%         | 122%              | 100%        |
| $\Delta$ zupT                                         | <b>88%</b>  | <b>87%</b>  | <b>95%</b>       | <b>94%</b>  | <b>103%</b>       | <b>95%</b>  |
| $\Delta$ zupT $\Delta$ W1-cluster                     | 120%        | 88%         | 105%             | 97%         | 99%               | 105%        |
| $\Delta$ zupT $\Delta$ W2                             | 102%        | 94%         | 101%             | 100%        | 101%              | 78%         |
| $\Delta$ zupT $\Delta$ W3                             | 137%        | 98%         | 127%             | 81%         | 144%              | 93%         |
| $\Delta$ zupT $\Delta$ W1-cl. $\Delta$ W3             | 133%        | 98%         | 112%             | 83%         | 111%              | 102%        |
| $\Delta$ zupT $\Delta$ W2 $\Delta$ W3                 | 134%        | 91%         | 122%             | 82%         | 113%              | 93%         |
| $\Delta$ zur                                          | <b>93%</b>  | <b>99%</b>  | <b>102%</b>      | <b>113%</b> | <b>118%</b>       | <b>113%</b> |
| $\Delta$ zur $\Delta$ W1-cluster                      | 100%        | 90%         | 102%             | 90%         | 96%               | 100%        |
| $\Delta$ zur $\Delta$ W2                              | 90%         | 77%         | 85%              | 66%         | 90%               | 73%         |
| $\Delta$ zur $\Delta$ W3                              | 115%        | 105%        | 101%             | 89%         | 99%               | 99%         |
| $\Delta$ zur $\Delta$ W1-cl. $\Delta$ W2              | 85%         | 71%         | 93%              | 69%         | 92%               | 75%         |
| $\Delta$ zur $\Delta$ W1-cl. $\Delta$ W3              | 82%         | 69%         | 94%              | 92%         | 87%               | 86%         |
| $\Delta$ zur $\Delta$ W2 $\Delta$ W3                  | 95%         | 94%         | 96%              | 70%         | 83%               | 71%         |
| $\Delta$ e4                                           | <b>373%</b> | 99%         | <b>343%</b>      | 103%        | <b>261%</b>       | 134%        |
| $\Delta$ e4 $\Delta$ W1-cluster                       | <b>24%</b>  | 73%         | <b>25%</b>       | 73%         | <b>37%</b>        | 84%         |
| $\Delta$ e4 $\Delta$ W3                               | <b>25%</b>  | 81%         | <b>24%</b>       | 71%         | <b>27%</b>        | 77%         |
| $\Delta$ e4 $\Delta$ W1-cl. $\Delta$ W2               | <b>24%</b>  | 75%         | <b>26%</b>       | 55%         | <b>29%</b>        | 69%         |
| $\Delta$ e4 $\Delta$ W1-cl. $\Delta$ W3               | <b>24%</b>  | 80%         | <b>25%</b>       | 67%         | <b>25%</b>        | 79%         |
| $\Delta$ e4 $\Delta$ W2 $\Delta$ W3                   | <b>21%</b>  | 67%         | <b>24%</b>       | 55%         | <b>28%</b>        | 80%         |
| $\Delta$ e4 $\Delta$ zupT                             | 88%         | 93%         | 97%              | 85%         | 92%               | 86%         |
| $\Delta$ e4 $\Delta$ zupT $\Delta$ cobW3              | <b>25%</b>  | 70%         | <b>29%</b>       | 79%         | <b>35%</b>        | 80%         |
| $\Delta$ e4 $\Delta$ zupT $\Delta$ W1-cl. $\Delta$ W3 | <b>23%</b>  | 62%         | <b>25%</b>       | 75%         | <b>27%</b>        | 83%         |
| $\Delta$ e4 $\Delta$ zupT $\Delta$ W2 $\Delta$ W3     | <b>24%</b>  | 64%         | <b>25%</b>       | 62%         | <b>27%</b>        | 55%         |
| $\Delta$ e4 $\Delta$ zur                              | <b>23%</b>  | 80%         | <b>25%</b>       | 80%         | <b>28%</b>        | 75%         |
| $\Delta$ e4 $\Delta$ zur $\Delta$ W2                  | <b>24%</b>  | 64%         | <b>24%</b>       | 69%         | <b>30%</b>        | 83%         |

The mutants carrying a deletion of the complete *cobW1* cluster, of the *cobW3* gene, or disruptions (dis) of *cobW1* or *cobW2*. The metal content was measured in cells grown in TMM with 100  $\mu$ M EDTA, 100  $\mu$ M ZnCl<sub>2</sub>, or no addition (10  $\mu$ M in case of the  $\Delta$ e4 strains). The metal content was compared: (i) CH34 cells grown in amended medium (bold boxes) to CH34 cells in unamended

medium (bold shaded box); (ii) CH34 mutants including the plasmid-free strain AE104 (shaded boxes) to CH34 cells cultivated under the same conditions (bold boxes in the top line); (iii) AE104 mutants including  $\Delta zupT$ ,  $\Delta zur$  and  $\Delta e4$  ( $\Delta cadA$   $\Delta zntA$   $\Delta fieF$   $\Delta dmeF$ ) (boxes) to AE104 cells cultivated under the same conditions (shaded boxes); (iv) mutants of  $\Delta zupT$ ,  $\Delta zur$  and  $\Delta e4$  to these respective parents grown under the same conditions. If  $D > 1$  ( $n > 4$ , deviation bars of the data points do not touch or overlap), a metal content  $< 50\%$  is in red, a metal content  $> 200\%$  in green. 100% values for CH34 cells in non-amended TMM:  $(11.9 \pm 1.0) \cdot 10^6$  Mg,  $(636 \pm 65) \cdot 10^3$  Fe atoms per cell.

**Supplementary Table S4. Ni and Co content of *C. metallidurans* derivatives**

| Bacterial strain                                      | Nickel      |             |             | Cobalt      |             |             |
|-------------------------------------------------------|-------------|-------------|-------------|-------------|-------------|-------------|
|                                                       | none        | EDTA        | Zn          | none        | EDTA        | Zn          |
| CH34                                                  | <b>1.00</b> | 1.33        | 1.80        | 1.00        | 1.25        | 1.00        |
| CH34 $\Delta$ W1-cluster                              | 2.23        | <b>3.02</b> | 2.06        | 1.00        | 0.67        | 0.50        |
| CH34 $\Delta$ W2                                      | <b>2.84</b> | <b>3.33</b> | <b>2.95</b> | 0.67        | 0.50        | 0.50        |
| CH34 $\Delta$ W3                                      | 1.32        | 0.91        | 1.56        | 1.67        | 1.17        | <b>2.17</b> |
| CH34 $\Delta$ W1-cl. $\Delta$ W2                      | <b>4.29</b> | <b>3.48</b> | <b>3.72</b> | 0.83        | 0.50        | 0.50        |
| CH34 $\Delta$ W1-cl. $\Delta$ W3                      | <b>3.18</b> | <b>2.58</b> | <b>2.52</b> | 0.75        | <b>0.42</b> | <b>0.42</b> |
| CH34 $\Delta$ W2 $\Delta$ W3                          | <b>2.99</b> | <b>3.18</b> | <b>3.80</b> | 1.42        | 0.92        | 0.83        |
| CH34 $\Delta$ W1-cl. $\Delta$ W2 $\Delta$ W3          | <b>4.03</b> | <b>3.06</b> | <b>4.42</b> | 0.83        | 0.50        | <b>0.42</b> |
| AE104                                                 | 1.26        | 0.72        | 1.06        | <b>2.75</b> | 2.00        | <b>2.92</b> |
| AE104 $\Delta$ W1-cluster                             | 0.84        | 0.77        | 1.05        | <b>5.17</b> | <b>2.50</b> | <b>3.75</b> |
| AE104 $\Delta$ W2                                     | 0.64        | 1.38        | 0.88        | <b>2.08</b> | 1.33        | <b>2.58</b> |
| AE104 $\Delta$ W3                                     | 0.53        | 0.73        | 1.25        | 1.25        | <b>0.42</b> | <b>2.42</b> |
| AE104 $\Delta$ W1-cl. $\Delta$ W3                     | 1.37        | 1.41        | 1.24        | <b>2.17</b> | 1.42        | <b>2.33</b> |
| AE104 $\Delta$ W2 $\Delta$ W3                         | 1.73        | 1.40        | 1.24        | <b>2.58</b> | 1.58        | <b>2.83</b> |
| $\Delta$ zupT                                         | 0.91        | 1.15        | 1.55        | <b>4.58</b> | <b>4.00</b> | <b>4.92</b> |
| $\Delta$ zupT $\Delta$ W1-cluster                     | 1.16        | 1.13        | 1.23        | <b>4.25</b> | <b>3.08</b> | <b>3.58</b> |
| $\Delta$ zupT $\Delta$ W2                             | 0.87        | 0.73        | 1.37        | <b>4.17</b> | <b>2.33</b> | <b>3.83</b> |
| $\Delta$ zupT $\Delta$ W3                             | 0.77        | 0.71        | 1.42        | <b>3.50</b> | 1.92        | <b>3.42</b> |
| $\Delta$ zupT $\Delta$ W1-cl. $\Delta$ W3             | 1.46        | 1.28        | 1.14        | <b>4.08</b> | <b>2.50</b> | <b>3.58</b> |
| $\Delta$ zupT $\Delta$ W2 $\Delta$ W3                 | 1.84        | 1.30        | 1.13        | <b>4.33</b> | <b>2.83</b> | <b>3.58</b> |
| $\Delta$ zur                                          | 1.24        | 0.54        | 1.51        | <b>2.33</b> | <b>2.67</b> | <b>2.83</b> |
| $\Delta$ zur $\Delta$ W1-cluster                      | 1.41        | 0.86        | 0.82        | 1.42        | 1.25        | 1.50        |
| $\Delta$ zur $\Delta$ W2                              | 0.87        | 0.56        | 0.59        | 1.58        | 1.25        | <b>1.92</b> |
| $\Delta$ zur $\Delta$ W3                              | 1.59        | 1.26        | 1.09        | <b>1.58</b> | 0.92        | 1.50        |
| $\Delta$ zur $\Delta$ W1-cl. $\Delta$ W2              | 0.64        | 0.77        | 0.45        | 1.50        | 1.42        | 1.50        |
| $\Delta$ zur $\Delta$ W1-cl. $\Delta$ W3              | 0.68        | 0.53        | 0.99        | 1.50        | 1.00        | 1.92        |
| $\Delta$ zur $\Delta$ W2 $\Delta$ W3                  | 0.82        | 0.60        | 0.54        | 1.58        | 1.00        | <b>1.75</b> |
| $\Delta$ e4                                           | 0.41        | 0.57        | 0.84        | <b>3.25</b> | <b>2.83</b> | <b>3.08</b> |
| $\Delta$ e4 $\Delta$ W1-cluster                       | 0.56        | 0.52        | 0.54        | <b>1.92</b> | <b>3.00</b> | 1.50        |
| $\Delta$ e4 $\Delta$ W3                               | 0.52        | 0.62        | 0.50        | <b>3.58</b> | 2.08        | 1.67        |
| $\Delta$ e4 $\Delta$ W1-cl. $\Delta$ W2               | <b>0.35</b> | 0.43        | 0.50        | <b>2.83</b> | <b>2.33</b> | <b>2.42</b> |
| $\Delta$ e4 $\Delta$ W1-cl. $\Delta$ W3               | 0.51        | 0.39        | 0.52        | <b>3.17</b> | <b>2.25</b> | <b>2.50</b> |
| $\Delta$ e4 $\Delta$ W2 $\Delta$ W3                   | 0.49        | 0.34        | 0.36        | <b>2.83</b> | <b>2.17</b> | <b>2.33</b> |
| $\Delta$ e4 $\Delta$ zupT                             | 0.46        | 0.37        | 0.86        | <b>4.33</b> | <b>3.17</b> | <b>2.17</b> |
| $\Delta$ e4 $\Delta$ zupT $\Delta$ cobW3              | 0.43        | 0.49        | 0.49        | <b>3.33</b> | <b>3.00</b> | <b>3.33</b> |
| $\Delta$ e4 $\Delta$ zupT $\Delta$ W1-cl. $\Delta$ W3 | 0.36        | 0.46        | 0.55        | <b>2.67</b> | <b>2.42</b> | <b>2.33</b> |
| $\Delta$ e4 $\Delta$ zupT $\Delta$ W2 $\Delta$ W3     | <b>0.29</b> | 0.30        | 0.39        | <b>2.92</b> | 1.83        | 2.83        |
| $\Delta$ e4 $\Delta$ zur                              | 0.48        | <b>0.36</b> | 0.39        | <b>3.33</b> | 1.25        | 1.33        |
| $\Delta$ e4 $\Delta$ zur $\Delta$ W2                  | <b>0.31</b> | <b>0.28</b> | <b>0.40</b> | 1.00        | 0.92        | 1.33        |

The mutants carrying a deletion of the complete *cobW1* cluster, of the *cobW3* gene, or disruptions (dis) of *cobW1* or *cobW2*. The metal content was measured in cells grown in TMM with 100  $\mu$ M EDTA, 100  $\mu$ M ZnCl<sub>2</sub>, or no addition (10  $\mu$ M ZnCl<sub>2</sub> in case of the  $\Delta$ e4 mutant) The metal content was compared to that of CH34 cells in unamended medium. If D

> 1 (n>4, deviation bars of the data points do not touch or overlap), a metal content < 67% is in red, a metal content > 133% in green. For nickel, also non-significant ratios are indicated in italics. 100% value for CH34 cells in non-amended TMM: 1200±500 Co, 4010±2190 Ni atoms per cell.

**Supplementary Table S5. Expression of reporter fusions of efflux systems<sup>a</sup>**

| Bacterial strain    | Basic act.<br>(U/mg dw) | EDTA        |             | ZnCl <sub>2</sub> |             | CoCl <sub>2</sub> |             | CdCl <sub>2</sub> |             |
|---------------------|-------------------------|-------------|-------------|-------------------|-------------|-------------------|-------------|-------------------|-------------|
|                     |                         | 1 mM        | 5 mM        | 750<br>μM         | 2 mM        | 0.1<br>mM         | 1 mM        | 10<br>μM          | 100<br>μM   |
| <i>ϕ(zntA-lacZ)</i> |                         |             |             |                   |             |                   |             |                   |             |
| CH34                | 21.0±7.7                | 0.97        | 1.01        | <b>2.13</b>       | <i>0.15</i> | 1.05              | 1.06        | <b>3.55</b>       | <b>4.72</b> |
| CH34 ΔW3            | 21.1±5.8                | 0.81        | 0.88        | <b>2.33</b>       | 0.54        | 1.08              | 1.43        | <b>4.56</b>       | <b>6.51</b> |
| AE104               | <b>50.4±5.8</b>         | 0.63        | 0.62        | <b>7.33</b>       | <b>5.95</b> | <b>3.10</b>       | 1.02        | <b>6.80</b>       | <b>5.79</b> |
| AE104 ΔW3           | <b>53.2±8.6</b>         | 0.65        | 0.65        | <b>9.42</b>       | <b>3.23</b> | <b>2.09</b>       | <b>1.42</b> | <b>8.37</b>       | <b>5.03</b> |
| Δ <i>zupT</i>       | 37.4±7.5                | 0.50        | 0.55        | <b>10.3</b>       | <b>5.48</b> | <b>1.65</b>       | 0.91        | <b>6.29</b>       | <b>15.7</b> |
| Δ <i>zupT</i> ΔW3   | <b>50.7±8.4</b>         | 0.72        | 0.61        | <b>8.33</b>       | <b>2.63</b> | <b>4.64</b>       | <b>2.14</b> | <b>7.92</b>       | <b>8.76</b> |
| <i>ϕ(cadA-lacZ)</i> |                         |             |             |                   |             |                   |             |                   |             |
| CH34                | 20.8±5.3                | 1.39        | 1.28        | 1.27              | 0.70        | 1.29              | 1.03        | <b>3.04</b>       | <b>9.44</b> |
| CH34 ΔW3            | <b>7.2±1.7</b>          | 1.06        | 1.09        | <b>2.48</b>       | 0.75        | 0.95              | 1.02        | <b>7.07</b>       | <b>17.5</b> |
| AE104               | 28.5±4.7                | 0.88        | 0.86        | <b>1.70</b>       | 0.77        | 1.07              | 1.01        | <b>8.30</b>       | <b>20.9</b> |
| AE104 ΔW3           | <b>15.0±2.6</b>         | 0.68        | 0.73        | <b>2.34</b>       | <b>1.67</b> | 1.24              | 0.87        | <b>12.3</b>       | <b>40.2</b> |
| Δ <i>zupT</i>       | 25.7±5.0                | 0.65        | 0.61        | <b>1.40</b>       | <b>0.35</b> | 1.14              | 0.91        | <b>6.70</b>       | <b>20.7</b> |
| Δ <i>zupT</i> ΔW3   | 25.2±7.5                | 0.75        | 0.73        | <b>1.82</b>       | 0.82        | 0.97              | 0.68        | <b>9.64</b>       | <b>2.77</b> |
| <i>ϕ(dmeF-lacZ)</i> |                         |             |             |                   |             |                   |             |                   |             |
| CH34                | 54.9±4.1                | 1.77        | 0.81        | 0.55              | <i>0.17</i> | 1.61              | 0.84        | 0.87              | 0.86        |
| CH34 ΔW3            | 35.6±4.0                | <b>2.05</b> | 0.94        | 0.40              | <b>0.02</b> | <b>2.08</b>       | 1.40        | 1.03              | 1.10        |
| AE104               | 33.4±6.7                | 1.43        | 1.69        | 1.52              | 0.58        | <b>2.13</b>       | <b>2.53</b> | 1.48              | <b>3.43</b> |
| AE104 ΔW3           | 31.7±7.9                | 1.47        | <b>2.79</b> | 1.53              | 0.55        | <b>2.45</b>       | <b>3.92</b> | 1.53              | <b>3.91</b> |
| Δ <i>zupT</i>       | 34.3±6.7                | 1.27        | 1.29        | 1.25              | <b>0.29</b> | <b>4.59</b>       | <b>3.31</b> | 1.34              | <b>3.12</b> |
| Δ <i>zupT</i> ΔW3   | <b>25.5±4.6</b>         | 1.06        | 1.94        | 1.79              | <b>0.59</b> | <b>3.82</b>       | <b>3.12</b> | 1.05              | <b>2.60</b> |
| <i>ϕ fieF-lacZ)</i> |                         |             |             |                   |             |                   |             |                   |             |
| CH34                | 18.3±1.8                | 1.20        | 1.06        | 0.55              | 0.27        | 1.00              | 0.85        | 0.97              | 0.96        |
| CH34 ΔW3            | 15.1±4.0                | 1.29        | 1.22        | 0.58              | 0.29        | 1.50              | 1.27        | 1.35              | 1.41        |
| AE104               | 20.1±4.4                | 1.15        | 0.99        | 1.29              | 0.50        | 1.19              | 0.98        | 1.13              | 0.83        |
| AE104 ΔW3           | 23.6±4.7                | 1.14        | 1.22        | 1.20              | 0.33        | 1.20              | 1.06        | 1.22              | 1.09        |
| Δ <i>zupT</i>       | 25.3±3.3                | 1.05        | 0.98        | 0.97              | 0.25        | 1.06              | 0.93        | 1.07              | 0.83        |
| Δ <i>zupT</i> ΔW3   | 31.0±4.8                | 1.03        | 0.93        | 0.72              | 0.27        | 0.95              | 0.84        | 1.07              | 0.88        |

<sup>a</sup> Chromosomal *lacZ* fusions were constructed downstream of *zntA* and *cadA*, leaving both functional. Parent strains were *C. metallidurans* CH34 wild type (top), AE104 (bottom), and the Δ*zupT* mutant. Early exponential-phase cells of these strains were cultivated for 3 h with shaking at 30°C in TMM without or with the indicated additions, and β-galactosidase activity was determined. The specific activity of cells grown in TMM without additions is provided, the remaining –fold up-regulation values refer to these values listed in the subsequent rows. Bold-faced numbers indicate significant up-regulation of the basic value of a fusion compared to non-amended medium (D > 1 and ratio > 2-fold, n ≥ 3), bold-faced values in italics down-regulation

**Supplementary Table S6. Expression of reporter fusions of import systems<sup>a</sup>**

| Fusion              | Bacterial strain |                   |               |                           |             |                  |
|---------------------|------------------|-------------------|---------------|---------------------------|-------------|------------------|
|                     | AE104            | AE104 $\Delta$ W3 | $\Delta$ zupT | $\Delta$ zupT $\Delta$ W3 | CH34        | CH34 $\Delta$ W3 |
| $\phi$ (zntB-lacZ)  | 6.97±1.11        | 1.10              | <b>5.45</b>   | <b>5.17</b>               | <b>0.00</b> | 0.80             |
| 0.5 mM Zn(II)       | 0.56             | 0.58              | <b>2.87</b>   | <b>2.22</b>               | <b>0.00</b> | <b>0.48</b>      |
| 5 mM EDTA           | 0.79             | 1.07              | <b>4.59</b>   | <b>4.72</b>               | <b>0.05</b> | 1.13             |
| $\phi$ (zupT-lacZ)  | 12.5±2.9         | 1.13              | n.d.          | n.d.                      | 1.34        | 1.12             |
| 0.5 mM Zn(II)       | 0.65             | 0.61              | n.d.          | n.d.                      | 0.81        | 0.75             |
| 5 mM EDTA           | <b>3.42</b>      | <b>5.72</b>       | n.d.          | n.d.                      | <b>5.66</b> | <b>4.99</b>      |
| $\phi$ (hoxN-lacZ)  | 0.87±1.68        | 0.00              | 5.13          | 0.00                      | 0.00        | 0.00             |
| 0.5 mM Zn(II)       | 0.49             | 0.11              | 1.64          | 0.00                      | 0.25        | 0.86             |
| 5 mM EDTA           | 1.65             | 0.00              | <b>10.5</b>   | 0.00                      | 0.35        | 0.00             |
| $\phi$ (pitA-lacZ)  | 157±35           | 1.63              | 1.03          | 1.36                      | 1.27        | 0.98             |
| 0.5 mM Zn(II)       | <b>0.49</b>      | 0.76              | 0.71          | 0.73                      | 0.52        | <b>0.48</b>      |
| 5 mM EDTA           | 0.63             | 1.15              | 0.85          | 1.28                      | 1.23        | 0.84             |
| $\phi$ (corA1-lacZ) | 59.0±10.0        | 0.79              | <b>0.33</b>   | <b>0.42</b>               | <b>0.43</b> | <b>0.37</b>      |
| 0.5 mM Zn(II)       | <b>0.45</b>      | <b>0.38</b>       | <b>0.04</b>   | <b>0.25</b>               | <b>0.19</b> | <b>0.22</b>      |
| 5 mM EDTA           | 0.80             | 0.63              | <b>0.38</b>   | <b>0.08</b>               | 0.67        | 0.65             |
| $\phi$ (corA2-lacZ) | 44.0±7.2         | 1.11              | 0.95          | 0.82                      | 1.21        | 0.86             |
| 0.5 mM Zn(II)       | 0.67             | 0.62              | <b>0.50</b>   | <b>0.39</b>               | <b>0.47</b> | 0.52             |
| 5 mM EDTA           | 0.68             | 0.87              | 0.83          | <b>0.50</b>               | 1.17        | 1.04             |
| $\phi$ (corA3-lacZ) | 32.7±6.0         | 1.09              | 0.91          | 0.90                      | <b>0.09</b> | 0.59             |
| 0.5 mM Zn(II)       | <b>0.49</b>      | <b>0.41</b>       | <b>0.24</b>   | <b>0.28</b>               | <b>0.06</b> | <b>0.39</b>      |
| 5 mM EDTA           | 0.56             | 0.62              | 0.66          | 0.74                      | <b>0.15</b> | 0.83             |
| $\phi$ (mgtA-lacZ)  | 5.57±1.17        | 1.15              | 1.00          | 0.79                      | <b>0.00</b> | <b>0.00</b>      |
| 0.5 mM Zn(II)       | <b>0.26</b>      | <b>0.29</b>       | <b>0.47</b>   | <b>0.20</b>               | <b>0.00</b> | <b>0.00</b>      |
| 5 mM EDTA           | 1.19             | 0.76              | 0.94          | 1.06                      | <b>0.00</b> | <b>0.00</b>      |
| $\phi$ (mgtB-lacZ)  | 10.3±2.6         | 0.95              | <b>0.49</b>   | 0.59                      | 1.01        | 0.65             |
| 0.5 mM Zn(II)       | 0.61             | 0.63              | <b>0.24</b>   | <b>0.29</b>               | <b>0.51</b> | 0.54             |
| 5 mM EDTA           | 0.66             | 0.95              | <b>0.54</b>   | 0.77                      | 1.20        | 0.95             |

<sup>a</sup> Chromosomal *lacZ* fusions were constructed. Parent strains were *C. metallidurans* CH34 wild type, AE104, AE104  $\Delta$ zupT, and their respective  $\Delta$ W3 mutants. Early exponential phase cells of these strains were cultivated for 3 h with shaking at 30°C in TMM without or with the indicated additions, and  $\beta$ -galactosidase activity was determined. The specific activity of cells grown in TMM without additions is given in the boxed areas in U/mg dry mass, the remaining –fold up-regulation values refer to these values listed in the subsequent cells. Bold-faced numbers indicate significant up-regulation of the basic value of a fusion compared to non-amended medium ( $D > 1$  and ratio  $> 2$ -fold,  $n \geq 3$ ), bold-faced values in italics down-regulation. Since some values for CH34 strains were zero, AE104 was used for reference in this experiment. Shaded areas indicate interesting results.

**Supplementary Table S7. Cellular metal content of cobalt-treated  $\Delta$ W3 mutants**

| Bacterial strain                      | Mg, -fold   | P, -fold    | Co, -fold          | Ni, -fold   | Fe, -fold   |
|---------------------------------------|-------------|-------------|--------------------|-------------|-------------|
| <u>25 <math>\mu</math>M Co</u>        |             |             |                    |             |             |
| CH34                                  | 1.00        | 1.00        | 1.00               | 1.00        | 1.00        |
| CH34 $\Delta$ W3                      | 0.84        | 0.89        | 0.84               | 2.08        | 1.19        |
| AE104                                 | 0.89        | 0.84        | <b>2.25</b>        | 0.73        | 0.80        |
| AE104 $\Delta$ W3                     | 0.79        | 0.79        | <b>2.19</b>        | 0.46        | 0.67        |
| $\Delta$ zupT                         | 0.74        | 0.76        | <b>2.66</b>        | 0.94        | 0.70        |
| $\Delta$ zupT $\Delta$ W3             | 1.00        | 0.85        | <u><b>3.45</b></u> | <b>0.37</b> | <b>0.59</b> |
| $\Delta$ zur                          | 0.82        | 0.83        | <b>2.91</b>        | 0.79        | 0.81        |
| $\Delta$ zur $\Delta$ W3              | 0.93        | 0.84        | <b>2.68</b>        | 1.46        | 1.00        |
| <u>1 <math>\mu</math>M Co</u>         |             |             |                    |             |             |
| $\Delta$ e4                           | <b>2.67</b> | <b>1.58</b> | 1.00               | 0.72        | 0.88        |
| $\Delta$ e4 $\Delta$ zupT             | <b>2.78</b> | <b>1.54</b> | 1.16               | 0.56        | 1.05        |
| $\Delta$ e4 $\Delta$ W3               | 0.92        | 0.87        | 1.73               | 0.78        | 1.01        |
| $\Delta$ e4 $\Delta$ zupT $\Delta$ W3 | 0.98        | 0.89        | 1.25               | 0.58        | 0.97        |

100% values for CH34:  $13.1 \pm 1.4 \times 10^6$  Mg,  $120 \pm 10 \times 10^6$  P,  $732 \pm 106 \times 10^3$  Fe,  $64.3 \pm 6.5 \times 10^3$  Zn,  $10.8 \pm 4.3 \times 10^3$  Cu,  $45.4 \pm 8.6 \times 10^3$  Co,  $4.53 \pm 1.53 \times 10^3$  Ni, and for  $\Delta$ e4 at 1  $\mu$ M cobalt  $33.6 \pm 1.4 \times 10^3$  Co. No change in the number of Cu atoms per cell. Bold-faced, if [(Q<0.66 OR Q>1.5) AND D >1], underlined value significantly different (54% more Co) than the AE104 parent level. Interesting results are boxed. The underlined cobalt content of  $\Delta$ zupT  $\Delta$ W3 is significantly different from the cobalt content of the  $\Delta$ zupT parent.



Supplementary Table S8. Bacterial strains and primers

| Strain                          | Plasmids           | Characteristics                                                                                                                                                                                                                                             | Referenz                               |
|---------------------------------|--------------------|-------------------------------------------------------------------------------------------------------------------------------------------------------------------------------------------------------------------------------------------------------------|----------------------------------------|
| <i>Escherichia coli</i>         |                    |                                                                                                                                                                                                                                                             |                                        |
| Rosetta (DE3)<br>pLysS<br>S17/1 | pLysSRARE          | <i>F</i> -, <i>ompT</i> , <i>gal</i> , <i>dcm</i> , <i>lon</i> , <i>hsdS<sub>B</sub></i> , ( <i>r<sub>B</sub><sup>-</sup>m<sub>B</sub></i> ) $\lambda$ (DE3),<br>pLysSRARE; <i>cam<sup>R</sup></i> ; BL21 (DE3)<br><i>pro</i> , <i>Tra<sup>+</sup> recA</i> | Stratagene GmbH,<br>Heidelberg<br>(10) |
| VS208                           | pASK-IBA7          | plasmid for expression with N-terminal Strep-tag <sup>®</sup> II, <i>amp<sup>R</sup></i>                                                                                                                                                                    | IBA-GmbH, Göttingen                    |
| VS218                           | pCM157             | plasmid for expression of <i>Cre</i> -<br>recombinase; <i>tet<sup>R</sup></i>                                                                                                                                                                               | (11)                                   |
| VS585                           | pECD794-1          | pLO2:: <i>lacZ</i> for transcriptional fusions; <i>kan<sup>R</sup></i>                                                                                                                                                                                      | (2)                                    |
| VS600                           | pRHB152            | pET28A TEV, <i>kan<sup>R</sup></i>                                                                                                                                                                                                                          | Novagen, Californien<br>(USA)          |
| VS624                           | pTH24:: <i>tev</i> | pET24 for Tev expression with C-terminal His-tag; <i>Amp<sup>R</sup></i>                                                                                                                                                                                    | (12)                                   |
| ECA61                           | pECD795            | <i>zntA</i> in pECD1794-1; <i>lacZ</i> -operon fusion<br>$\phi$ ( <i>zntA-lacZ</i> ), <i>kan<sup>R</sup></i>                                                                                                                                                | (13)                                   |
| ECA62                           | pECD796-1          | <i>cadA</i> in pECD1794-1; <i>lacZ</i> -operon fusion<br>$\phi$ ( <i>cadA-lacZ</i> ), <i>kan<sup>R</sup></i>                                                                                                                                                | (13)                                   |
| ECA410                          | pECD986            | <i>pitA</i> in pECD1794-1; <i>lacZ</i> -operon fusion<br>$\phi$ ( <i>pitA-lacZ</i> ), <i>kan<sup>R</sup></i>                                                                                                                                                | (17)                                   |
| ECA411                          | pECD987            | <i>zupT</i> in pECD1794-1; <i>lacZ</i> -operon fusion<br>$\phi$ ( <i>zupT-lacZ</i> ), <i>kan<sup>R</sup></i>                                                                                                                                                | (17)                                   |
| ECA412                          | pECD988            | <i>corA<sub>1</sub></i> in pECD1794-1; <i>lacZ</i> -operon fusion<br>$\phi$ ( <i>corA<sub>1</sub>-lacZ</i> ), <i>kan<sup>R</sup></i>                                                                                                                        | (17)                                   |
| ECA413                          | pECD989            | <i>corA<sub>2</sub></i> in pECD1794-1; <i>lacZ</i> -operon fusion<br>$\phi$ ( <i>corA<sub>2</sub>-lacZ</i> ), <i>kan<sup>R</sup></i>                                                                                                                        | (17)                                   |
| ECA414                          | pECD990            | <i>corA<sub>3</sub></i> in pECD1794-1; <i>lacZ</i> -operon fusion<br>$\phi$ ( <i>corA<sub>3</sub>-lacZ</i> ), <i>kan<sup>R</sup></i>                                                                                                                        | (17)                                   |
| ECA410                          | pECD986            | <i>pitA</i> in pECD1794-1; <i>lacZ</i> -operon fusion<br>$\phi$ ( <i>pitA-lacZ</i> ), <i>kan<sup>R</sup></i>                                                                                                                                                | (17)                                   |
| ECA483                          | pECD1003           | <i>lacZ</i> , <i>sacB</i> ; <i>km<sup>R</sup></i> , <i>tet<sup>R</sup></i> , <i>amp<sup>R</sup></i> ; pCM184 with<br>mutations of <i>loxP66</i> & <i>loxP71</i>                                                                                             | (2)                                    |
| ECA779                          | pECD1204           | pECD794-1 with <i>Rmet_1098</i> as <i>PstI/XbaI</i><br>fragment $\phi$ ( <i>cobW<sub>1</sub>'::lacZ</i> )354, <i>kan<sup>R</sup></i>                                                                                                                        | (14)                                   |
| ECA814                          | pECD1239           | pET28A TEV with <i>cobW<sub>1</sub></i> as <i>SacI/BamHI</i> -<br>fragment, <i>kan<sup>R</sup></i>                                                                                                                                                          | This publication                       |
| ECA815                          | pECD1240           | pET28A TEV with <i>cobW<sub>2</sub></i> as <i>SacI/BamHI</i> -<br>fragment, <i>kan<sup>R</sup></i>                                                                                                                                                          | This publication                       |
| ECA816                          | pECD1241           | pET28A TEV with <i>cobW<sub>3</sub></i> as <i>SacI/BamHI</i> -<br>fragment, <i>kan<sup>R</sup></i>                                                                                                                                                          | This publication                       |
| ECA819                          | pECD1244           | pECD794-1 with <i>cobW<sub>2</sub></i> as <i>PstI/XbaI</i> fragment<br>$\phi$ ( <i>cobW<sub>2</sub>'::lacZ</i> )299, <i>kan<sup>R</sup></i>                                                                                                                 | (15)                                   |
| ECA914                          | pECD1339           | pASK-IBA7 with <i>zur</i> as <i>Sall/XbaI</i> fragment,<br><i>amp<sup>R</sup></i>                                                                                                                                                                           | (16)                                   |

|        |          |                                                                                                                                                 |                  |
|--------|----------|-------------------------------------------------------------------------------------------------------------------------------------------------|------------------|
| ECB018 | pECD1442 | <i>fieF</i> in pECD1794-1; <i>lacZ</i> -operon fusion $\phi(\textit{fieF-lacZ})$ , kan <sup>R</sup>                                             | This publication |
| ECB062 | pECD1486 | <i>zntB</i> in pECD1794-1; <i>lacZ</i> -operon fusion $\phi(\textit{zntB-lacZ})$ , kan <sup>R</sup>                                             | (5)              |
| ECB063 | pECD1487 | <i>hoxN</i> in pECD1794-1; <i>lacZ</i> -operon fusion $\phi(\textit{hoxN-lacZ})$ , kan <sup>R</sup>                                             | (5)              |
| ECB064 | pECD1488 | <i>mgtA</i> in pECD1794-1; <i>lacZ</i> -operon fusion $\phi(\textit{mgtA-lacZ})$ , kan <sup>R</sup>                                             | (6)              |
| ECB065 | pECD1489 | <i>mgtB</i> in pECD1794-1; <i>lacZ</i> -operon fusion $\phi(\textit{mgtB-lacZ})$ , kan <sup>R</sup>                                             | (6)              |
| ECB188 | pECD1606 | pECD1003 for <i>cobW</i> <sub>3</sub> -deletion; <i>cre-lox</i> -System                                                                         | This publication |
| ECB189 | pECD1607 | pECD1003 for <i>cobW</i> <sub>1</sub> -Cluster ( <i>Rmet</i> <sub>1098</sub> bis <i>Rmet</i> <sub>1103</sub> )-deletion; <i>cre-lox</i> -System | This publication |
| ECB190 | pECD1608 | <i>cobW</i> <sub>3</sub> in pECD1794-1; <i>lacZ</i> -operon fusion $\phi(\textit{cobW}_3-lacZ)$ , kan <sup>R</sup>                              | (15)             |
| ECB191 | pECD1609 | <i>cobW</i> <sub>2</sub> in pECD1794-1; <i>lacZ</i> -operon fusion $\phi(\textit{cobW}_2-lacZ)$ , kan <sup>R</sup>                              | (15)             |
| ECB195 | pECD1612 | <i>dmeF</i> in pECD1794-1; <i>lacZ</i> -operon fusion $\phi(\textit{dmeF-lacZ})$ , kan <sup>R</sup>                                             | This publication |
| ECB194 | pECD1611 | pASK-IBA3 with <i>FolE</i> <sub>IB2</sub> ( <i>Rmet</i> <sub>1099</sub> ) as <i>SacI/NcoI</i> fragment, amp <sup>R</sup>                        | This publication |

---

*Cupriavidus metallidurans*


---

|       |          |                                                                                                                                                    |                  |
|-------|----------|----------------------------------------------------------------------------------------------------------------------------------------------------|------------------|
| CH34  | pMOL28   |                                                                                                                                                    | (17)             |
|       | pMOL30   |                                                                                                                                                    |                  |
| AE104 |          |                                                                                                                                                    | (17)             |
| DN515 |          | AE104 $\Delta\textit{zupT}$                                                                                                                        | (18)             |
| DN578 |          | AE104 $\Delta\textit{zntA}\Delta\textit{cadA}\Delta\textit{fieF}\Delta\textit{dmeF}$ ( $\Delta\textit{e4}$ )                                       | (2)              |
| DN579 |          | AE104 $\Delta\textit{zntA}\Delta\textit{cadA}\Delta\textit{fieF}\Delta\textit{dmeF}\Delta\textit{zupT}$ ( $\Delta\textit{e4}\Delta\textit{zupT}$ ) | (1)              |
| DN780 |          | $\Delta\textit{e4}\Delta\textit{zur}$                                                                                                              | This publication |
| DN818 |          | AE104 $\Delta\textit{cobW}_3$                                                                                                                      | This publication |
| DN819 | pMOL28   | CH34 $\Delta\textit{cobW}_3$                                                                                                                       | This publication |
|       | pMOL30   |                                                                                                                                                    |                  |
| DN820 | pMOL28   | CH34 $\Delta\textit{cobW}_1$ -Cluster                                                                                                              | This publication |
|       | pMOL30   |                                                                                                                                                    |                  |
| DN821 |          | AE104 $\Delta\textit{zur}\Delta\textit{cobW}_3$                                                                                                    | This publication |
| DN822 |          | AE104 $\Delta\textit{zur}\Delta\textit{cobW}_1$ -Cluster                                                                                           | This publication |
| DN823 | pMOL28   | CH34 $\Delta\textit{cobW}_1$ -Cluster $\Delta\textit{cobW}_3$                                                                                      | This publication |
|       | pMOL30   |                                                                                                                                                    |                  |
| DN824 |          | AE104 $\Delta\textit{zurT}\Delta\textit{cobW}_3$                                                                                                   | This publication |
| DN825 | pECD1204 | AE104 $\Delta\textit{zur}\Delta\textit{cobW}_3$ $\phi(\textit{cobW}_2'::\textit{lacZ})$ 299                                                        | This publication |
| DN826 | pECD1204 | AE104 $\Delta\textit{zur}\Delta\textit{cobW}_1$ -Cluster $\phi(\textit{cobW}_2'::\textit{lacZ})$ 299                                               | This publication |
| DN827 | pECD1204 | $\Delta\textit{e4}\Delta\textit{zur}$ $\phi(\textit{cobW}_2'::\textit{lacZ})$ 299                                                                  | This publication |
| DN828 |          | $\Delta\textit{e4}\Delta\textit{cobW}_1$ -Cluster                                                                                                  | This publication |
| DN829 | pMOL28   | CH34 $\phi(\textit{cobW}_2'::\textit{lacZ})$ 299                                                                                                   | This publication |
|       | pMOL30   |                                                                                                                                                    |                  |
|       | pECD1204 |                                                                                                                                                    |                  |
| DN830 | pMOL28   | CH34 $\Delta\textit{cobW}_3$ $\phi(\textit{cobW}_2'::\textit{lacZ})$ 299                                                                           | This publication |

|       |          |                                                                                                                     |                  |
|-------|----------|---------------------------------------------------------------------------------------------------------------------|------------------|
|       | pMOL30   |                                                                                                                     |                  |
|       | pECD1204 |                                                                                                                     |                  |
| DN831 | pMOL28   | CH34 $\Delta$ <i>cobW</i> <sub>1</sub> -Cluster $\varphi$ ( <i>cobW</i> <sub>2</sub> '::lacZ)299                    | This publication |
|       | pMOL30   |                                                                                                                     |                  |
|       | pECD1204 |                                                                                                                     |                  |
| DN832 | pMOL28   | CH34 $\Delta$ <i>cobW</i> <sub>1</sub> -Cluster $\Delta$ <i>cobW</i> <sub>3</sub>                                   | This publication |
|       | pMOL30   | $\varphi$ ( <i>cobW</i> <sub>2</sub> '::lacZ)299                                                                    |                  |
|       | pECD1204 |                                                                                                                     |                  |
| DN833 |          | $\Delta$ e4 $\Delta$ <i>cobW</i> <sub>3</sub>                                                                       | This publication |
| DN834 |          | $\Delta$ e4 $\Delta$ <i>zurT</i> $\Delta$ <i>cobW</i> <sub>3</sub>                                                  | This publication |
| DN835 | pECD1204 | AE104 $\Delta$ <i>zurT</i> $\Delta$ <i>cobW</i> <sub>3</sub> $\varphi$ ( <i>cobW</i> <sub>1</sub> '::lacZ)354       | This publication |
| DN836 | pECD1244 | AE104 $\Delta$ <i>zurT</i> $\Delta$ <i>cobW</i> <sub>3</sub> $\varphi$ ( <i>cobW</i> <sub>2</sub> '::lacZ)299       | This publication |
| DN837 | pECD1204 | AE104 $\Delta$ <i>cobW</i> <sub>3</sub> $\varphi$ ( <i>cobW</i> <sub>1</sub> '::lacZ)354                            | This publication |
| DN838 | pECD1244 | AE104 $\Delta$ <i>cobW</i> <sub>3</sub> $\varphi$ ( <i>cobW</i> <sub>2</sub> '::lacZ)299                            | This publication |
| DN839 | pECD1244 | $\Delta$ e4 $\Delta$ <i>cobW</i> <sub>1</sub> -Cluster $\varphi$ ( <i>cobW</i> <sub>2</sub> '::lacZ)299             | This publication |
| DN840 | pECD1204 | AE104 $\Delta$ <i>zurT</i> $\Delta$ <i>cobW</i> <sub>3</sub> $\varphi$ ( <i>cobW</i> <sub>1</sub> '::lacZ)354       | This publication |
| DN841 | pECD1204 | $\Delta$ e4 $\Delta$ <i>cobW</i> <sub>3</sub> $\varphi$ ( <i>cobW</i> <sub>1</sub> '::lacZ)354                      | This publication |
| DN842 | pECD1204 | $\Delta$ e4 $\Delta$ <i>zurT</i> $\Delta$ <i>cobW</i> <sub>3</sub> $\varphi$ ( <i>cobW</i> <sub>1</sub> '::lacZ)354 | This publication |
| DN843 | pECD1244 | $\Delta$ e4 $\Delta$ <i>cobW</i> <sub>3</sub> $\varphi$ ( <i>cobW</i> <sub>2</sub> '::lacZ)299                      | This publication |
| DN844 | pECD1244 | $\Delta$ e4 $\Delta$ <i>zurT</i> $\Delta$ <i>cobW</i> <sub>3</sub> $\varphi$ ( <i>cobW</i> <sub>2</sub> '::lacZ)299 | This publication |

## Primers

| name/orientation $\rightarrow/\leftarrow$                      | 5' $\rightarrow$ 3' sequence           | position                                                     |
|----------------------------------------------------------------|----------------------------------------|--------------------------------------------------------------|
| <b>gene disruption</b>                                         |                                        |                                                              |
| <i>Rmet_0127 PstI</i> Dis $\rightarrow$                        | AAACTGCAGGCTCGACAAGCAGGAAGAAG          | binds 412 bp downstream of ATG <sub><i>Rmet_0127</i></sub>   |
| <i>Rmet_0127 XbaI</i> Dis $\leftarrow$                         | AAATCTAGAGCAATCGGTGCCGCAGTGT           | binds 376 bp upstream of TGA <sub><i>Rmet_0127</i></sub>     |
| <i>Rmet_1098 PstI</i> Dis $\rightarrow$                        | AAACTGCAGGGCCGCAGTCTCAATGAGG           | binds 270 bp downstream of ATG <sub><i>Rmet_1098</i></sub>   |
| <i>Rmet_1098 XbaI</i> Dis $\leftarrow$                         | AAATCTAGAGGGCGCTTTTCGATGCTTCC          | binds 550 bp upstream of TGA <sub><i>Rmet_5377</i></sub>     |
| <b>cre-lox</b>                                                 |                                        |                                                              |
| <i>Cre 0125 Age</i> $\rightarrow$                              | AAAACCGTTTCGAATCCGGCGACTATGGCTG        | binds 332 bp upstream of ATG <sub><i>cobW3</i></sub>         |
| <i>Cre 0125 Apa</i> $\leftarrow$                               | AAAGGGCCCGATGATCGATGTTGATGCAACAAA<br>G | binds directly upstream of ATG <sub><i>cobW3</i></sub>       |
| <i>Cre 0125 NotI</i> $\rightarrow$                             | AAAGCGGCCGCAGTCCTGCACCCTCTCTC          | binds directly downstream TGA <sub><i>cobW3</i></sub>        |
| <i>Cre 0125 NcoI</i> $\rightarrow$                             | AAACCATGGCCAGTTGGCTGGCTTGAC            | binds 311 bp downstream of TGA <sub><i>cobW3</i></sub>       |
| <i>Cre 1098 MunI</i> $\rightarrow$                             | AAACAATTGGTTACCCACTTCGGATACG           | binds 385 bp upstream of ATG <sub><i>cobW1</i></sub>         |
| <i>Cre 1098 NotI</i> $\leftarrow$                              | AAAGCGGCCGCAGGGGATTTGGTTTGCCCG         | binds directly upstream of ATG <sub><i>cobW1</i></sub>       |
| <i>Cre cobW</i> <sub>1</sub> -Cluster <i>Apa</i> $\rightarrow$ | AAAGGGCCCAATCAGGCGGCAGGGG              | binds directly downstream of TGA <sub><i>Rmet_1103</i></sub> |
| <i>Cre cobW</i> <sub>1</sub> -Cluster <i>Age</i> $\leftarrow$  | AAAACCGGTAAGGTAACCGGCGATATG            | binds 296 bp downstream of TGA <sub><i>Rmet_1103</i></sub>   |
| <i>Cre 0128 Age</i> $\rightarrow$                              | AAAACCGTTCTCGCGCTTGCTGTAGG             | binds 399 bp upstream of ATG <sub><i>zur</i></sub>           |
| <i>Cre 0128 Apa</i> $\leftarrow$                               | AAAGGGCCCGGAAGGATTTAACCATAGG           | binds directly upstream of ATG <sub><i>zur</i></sub>         |

|                               |                                                 |                                                       |
|-------------------------------|-------------------------------------------------|-------------------------------------------------------|
| <i>Cre 0128 NcoI</i>          | AAACCATGG-CGAACGCGATCTTGCCTTC                   | <i>binds 330 bp downstream of TGA<sub>zur</sub></i>   |
| <i>Cre 0128 NotI</i>          | AAAGCGGCCGCCACATCCAGACACCTTTAG                  | <i>binds directly downstream of TGA<sub>zur</sub></i> |
| <b>fusions His-/Strep-tag</b> |                                                 |                                                       |
| <i>1098 BamHI His</i> →       | AAAGGATCCCTTCCAGCCAAGCTTCCTG                    | 5' part of <i>cobW</i> <sub>1</sub> without ATG       |
| <i>1098 SacI His</i> ←        | AAAGAGCTCAGTGTGAGGGCCAGTCAGG                    | 3' part of <i>cobW</i> <sub>1</sub> with TGA          |
| <i>pRHB152 0127 BamHI</i> →   | AAAGGATCCTCCAAACTGATTCCGGTCACG                  | 5' part of <i>cobW</i> <sub>2</sub> without ATG       |
| <i>pRHB152 0127 SacI</i> ←    | AAAGAGCTCTAAAGTCAGGCGAGGCAGGC                   | 3' part of <i>cobW</i> <sub>2</sub> with TGA          |
| <i>pRHB152 0125 BamHI</i> →   | AAAGGATCCGCCGTTCTGCTGCCCGTCA                    | 5' part of <i>cobW</i> <sub>3</sub> without ATG       |
| <i>pRHB152 0125 SacI</i> ←    | AAAGAGCTCTCAGTGTGCATGTCCGCAATC                  | 3' part of <i>cobW</i> <sub>3</sub> with TGA          |
| <i>pASK3 Rmet_1099 SacI</i> → | AAAGAGCTCCGCCCAGGACATTGGGGATGC                  | 5' part of <i>folE</i> <sub>IB2.5</sub> without ATG   |
| <i>pASK3 Rmet_1099 NcoI</i> ← | AAACCATGGGCGGCCACCTCCCGTGAATG                   | 3' part of <i>folE</i> <sub>IB2.5</sub> without TGA   |
| <b>lacZ-fusions</b>           |                                                 |                                                       |
| <i>dmeF-lacZ PstI</i> →       | AAACTGCAGAGCGGGACGGTGCTGCTC                     | <i>binds 315 bp upstream of TAG<sub>dmeF</sub></i>    |
| <i>dmeF-lacZ XbaI</i> →       | AAATCTAGATTGCCGCCTAGTGACGGTG                    | <i>binds directly upstream of TAG<sub>dmeF</sub></i>  |
| <b>RT-PCR zur region</b>      |                                                 |                                                       |
| <i>Rmet_0125 PstI Dis h</i> → | AAACTGCAGCCGCTTCTTGCAGGACTAC                    | 4300                                                  |
| <i>Rmet_0125 XbaI Dis h</i> ← | AAATCTAGATTGCCAGCCGGCGCGTT                      | 4603                                                  |
| <i>Rmet_0126 PstI Dis h</i> → | AAACTGCAGGCCAGCCAGAGTGAAACAG                    | 3298                                                  |
| <i>Rmet_0126 XbaI Dis h</i> ← | AAATCTAGATCCGGCACGATGACCGTTT                    | 3564                                                  |
| <i>Rmet_0127 PstI Dis h</i> → | AAACTGCAGGCTCGACAAGCAGGAAGAAG                   | 2128                                                  |
| <i>Rmet_0127 XbaI Dis h</i> ← | AAATCTAGAGCAATCGGTGCCGCGAGTGT                   | 2425                                                  |
| <i>Rmet_0128 PstI Dis h</i> → | AAACTGCAGACATGCGGCTGCGTCCGA                     | 1166                                                  |
| <i>Rmet_0128 XbaI Dis h</i> ← | AAATCTAGAGTCGTTGCCGGCGCGTTT                     | 1427                                                  |
| <i>Cre 0125 Age</i> →         | AAAACCGTTTGAATCCGGCGACTATGGCTG                  | 3669                                                  |
| <i>Cre 0125 Not</i> →         | AAA GCG GCC GC AGTCCTGCACCCTCTCTC               | 5176                                                  |
| <i>Cre 0125 Nco</i> ←         | AAACCATGGCCAGGTTGGCTGGCTTGAC                    | 5487                                                  |
| <i>Cre 0125 Apa</i> ←         | <u>AAA GGG CCC GC</u> GATGATCGATGTTGATGCAACAAAG | 4000                                                  |
| <i>Cre 0126 Mun</i> ←         | AAA CAA TTG CAGCCGTTCTGACTTCGGCAAGC             | 4147                                                  |
| <i>Cre 0126 Apa</i> ←         | AAAGGGCCCCGCGGGACACCTCTCTACG                    | 3118                                                  |
| <i>Cre 0126 Not</i> →         | AAA GCG GCC GC TTCGATCCTTCGAGAGGCGGAAA          | 3809                                                  |
| <i>Cre 0126 Age</i> →         | AAAACCGGT CGTTTAGTGCGCCATCAGAC                  | 2806                                                  |
| <i>Cre 0127 Age</i> →         | AAAACCGGTACCGCGTGACCGTGACCG                     | 1354                                                  |
| <i>Cre 0127 Not</i> →         | AAA GCG GCC GC CTTTACGTTTAGTGCGCCATC            | 2801                                                  |
| <i>Cre 0127 Nco</i> ←         | AAACCATGGCTCTCTACGCGTCAAGAGTG                   | 3110                                                  |
| <i>Cre 0127 Apa</i> ←         | AAA GGG CCC GC GTTGTGGTACTCCGAGAAAA             | 1708                                                  |
| <i>Cre 0128 Nco</i> ←         | AAACCATGGCGAACGCGATCTTGCCTTC                    | 1988                                                  |
| <i>Cre 0128 Age</i> →         | AAAACCGGTTCTCGCGCTTGCTGTAGG                     | 749                                                   |
| <i>Cre 0128 Apa</i> ←         | AAA GGG CCC GC GCGAAGGATTTAACCATAGG             | 1148                                                  |
| <i>Cre 0128 Not</i> →         | AAA GCG GCC GC CACATCCAGACACCTTTAG              | 1659                                                  |
| <i>cobW2→dksA 2532up</i> →    | GCA GCG ACA AGC CGT TCC                         | 2532                                                  |
| <i>cobW2→dksA3328down</i> ←   | GTC CGC TCG GGT GCA GTG                         | 3328                                                  |
| <i>cobW3→0124 4835 up</i> →   | GCA TGG TGG GCA GCG ATC                         | 4835                                                  |
| <b>RT-PCR cobW1 region</b>    |                                                 |                                                       |
| <i>Rmet_1098 PstI Dis h</i> → | AAACTGCAGGGCCGCGAGTCTCAATGAGG                   | 10364                                                 |
| <i>Rmet_1098 XbaI Dis h</i> ← | AAATCTAGAGGGCGCTTTTCGATGCTTCC                   | 10717                                                 |
| <i>Rmet_1098 Mun1</i> →       | AAACAA TTGGTTACCCACTTCGGATACG                   | 9616                                                  |
| <i>Rmet_1098 Not2</i> ←       | AAA GCG GCC GC GGGGATTTGGTTTGCCCG               | 10000                                                 |

|                       |   |                                  |       |
|-----------------------|---|----------------------------------|-------|
| Rmet_1098 Apa3        | → | AAA GGG CCC GCCACTTTGGGCTCCCCATG | 11195 |
| Rmet_1098 Age4        | ← | AAAACCGGTCGCTGCCTGTCTCGCAATC     | 11561 |
| Crelox F1 1099 Mun    | → | AAA CAA TTG GCGCCGTTGCCAGGCAC    | 10922 |
| Crelox F1 1099 Nco    | ← | AAACCATGG CATGGGGAGCCCAAAGTGT    | 11212 |
| Crelox F2 1099 Apa    | → | AAA GGG CCC GC CGCATGACTTCCGCGC  | 12178 |
| Crelox F2 1099 Age    | ← | AAAACCGGTCGCGCGCATGTCTTCGTGG     | 12495 |
| Rm1100→13324          | → | CGG ATG ATG GCG TCG GGA          | 13324 |
| Rm1101→13913          | ← | GTT CGG CGC TTG GCG ACA          | 13913 |
| Rm1101→13880          | → | GCC AGC ATT CAG AGC GTT          | 13880 |
| Rm1102→14505          | ← | TAA ACA CCC CAT TGC CGA          | 14505 |
| Rm1102→14473          | → | GCG TCG TGC CAT CGT CCA          | 14473 |
| Rm1103→15144          | ← | GCG TGT TCG GCA TCT CGA          | 15144 |
| Rm1103→15923          | → | GAC CTG ACA AGC GCC GGA          | 15923 |
| Rm1104→16587          | ← | TTG CCA CGC CGA GCT ACA          | 16587 |
| 166bp vor Zurbox 9735 | → | TCG CCT GGC AGT ACG GGA          | 9735  |
| up                    |   |                                  |       |
| folE2→cysS 11889up    | → | TTG CCG TCG ATT TGC CGA          | 11889 |

---

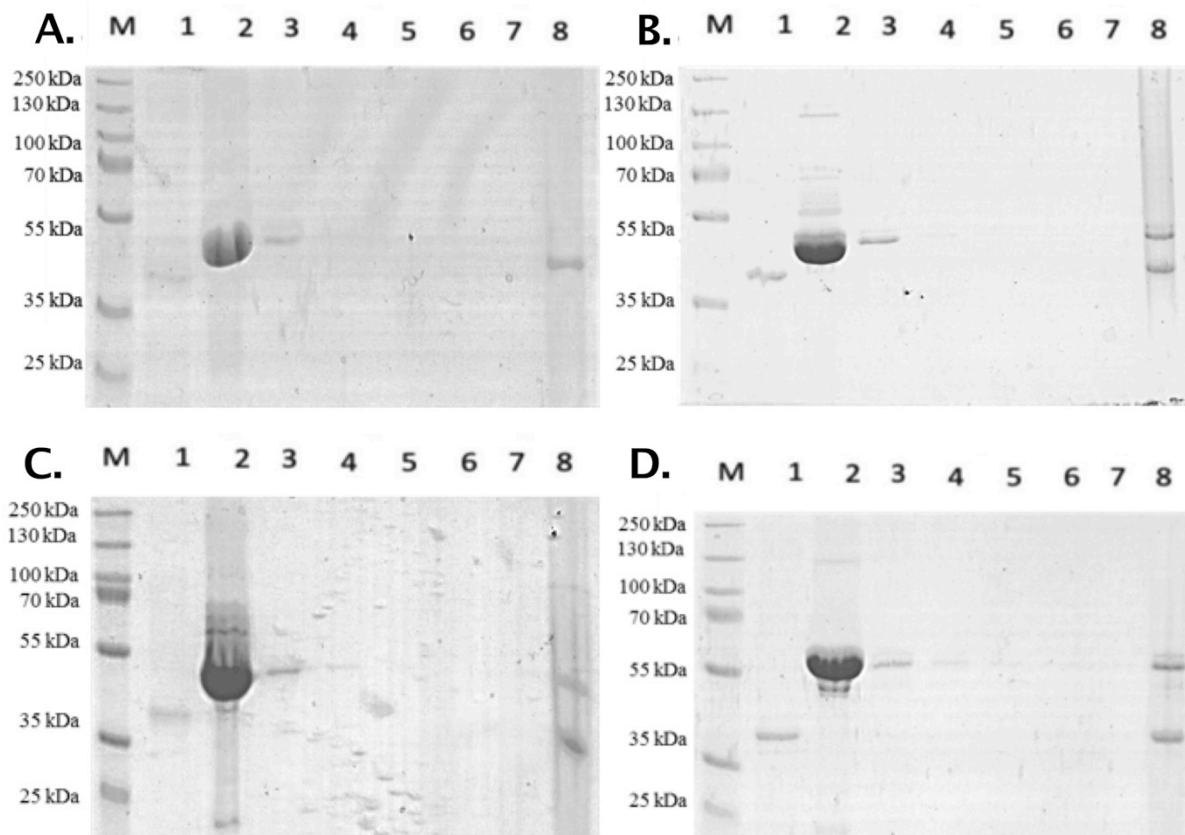

**Supplementary Figure S1. Interaction of CobWs with FolE<sub>IB2</sub>.** A pull-down assay was performed using magnetic MagStrep XT beads washed three times in buffer W (50 mM TrisHCl, pH 8, 150 mM NaCl) to bind 10 µg of FolE<sub>IB2</sub>-strep-tag for 30 min at 4 °C in buffer W (50 mM TrisHCl, pH 8, 150 mM NaCl) additionally containing 500 µM MgCl<sub>2</sub>, 10 µM GTP and 10 µM ZnCl<sub>2</sub> (Panels B, C, D) or no zinc (Panel A). The supernatant (Lane 1) was removed and 100 µg CobW1-His-tag (Panels A and B), CobW2-His-tag (Panel C) or CobW3-His-tag (Panel D) were added. The mixture was incubated for 3 h at 4 °C. Again, the supernatant was removed (Lane 2) and the beads washed with buffer W five times (Lanes 3 to 7). Finally, the bound proteins were removed using two-fold concentrated SDS sample buffer (Lane 8). The Panels show Coomassie-stained SDS polyacrylamide gels.

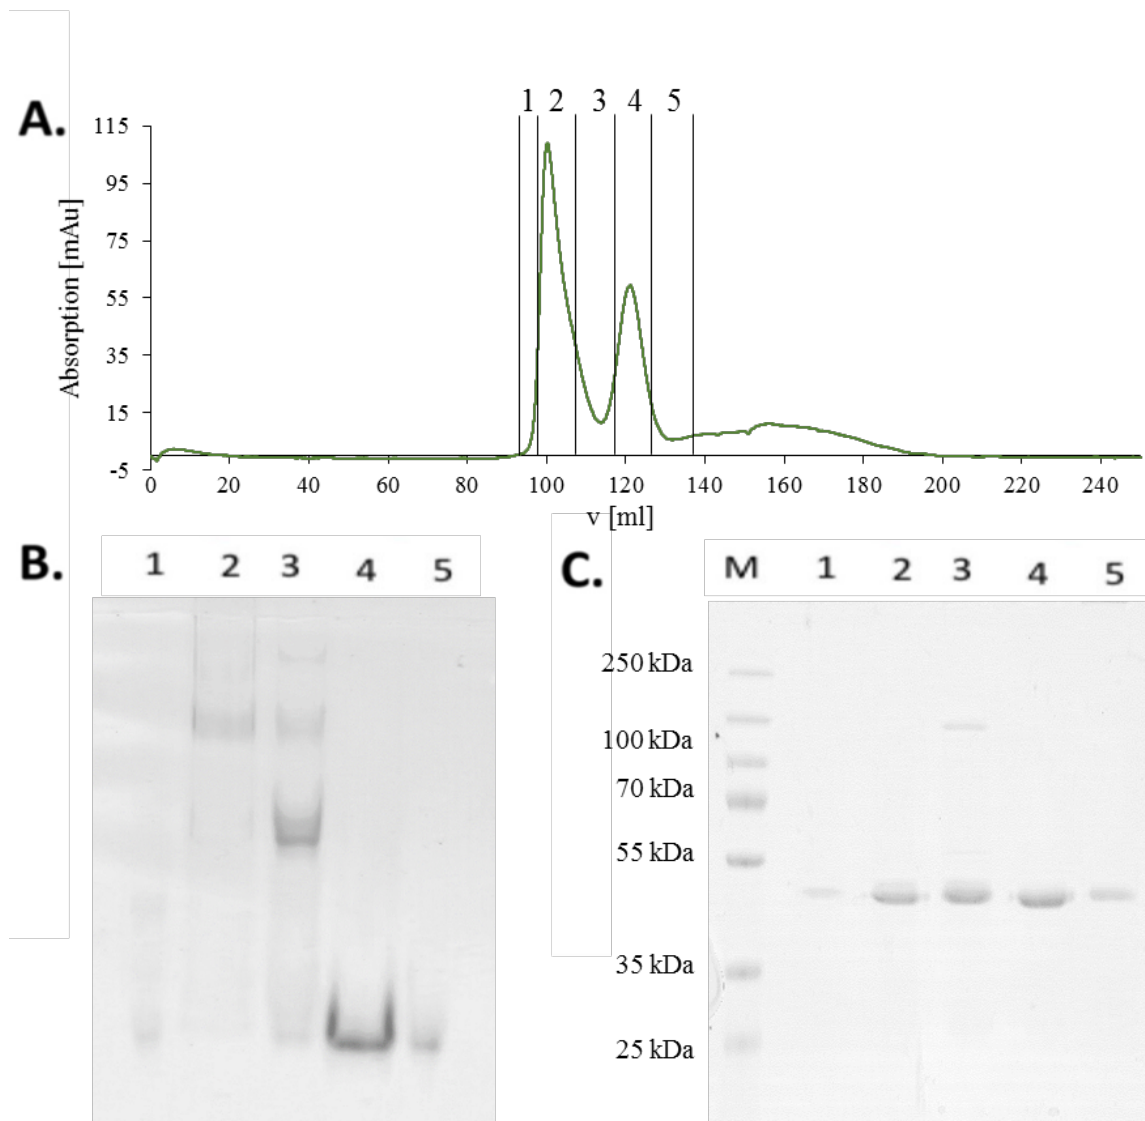

**Supplementary Figure S2. Dimerization of CobW1.** An amount of 5 mg of apo-CobW1 was analyzed by size exclusion chromatography using a HiPrep Sephacryl S-100 column and Tris buffer (50 mM, pH = 8) containing 150 mM NaCl. Panel A shows the elution profile at 280 nm. Samples corresponding to 5  $\mu$ g were applied to a non-denaturing (Panel B) and SDS polyacrylamide gel (Panel C). The additional band in Panel C lane 3 was identified by MALDI-TOF-MS as contaminating pyruvate kinase from *E. coli*. Presence of this protein resulted in a complicated pattern in the non-denaturing polyacrylamide gel (lane B3). Coomassie-staining.

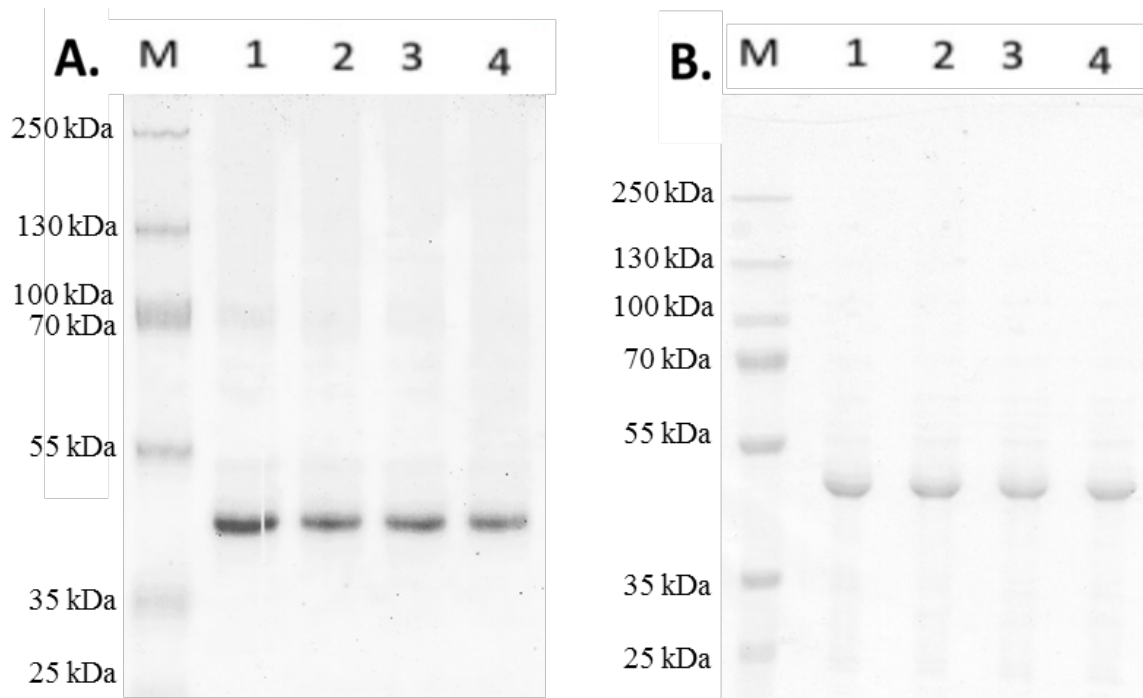

**Supplementary Figure S3. CobW1 did not form dimers when zinc was added.** An amount of 5 µg of CobW1 monomers as purified by size exclusion chromatography was incubated with 1 mM ZnCl<sub>2</sub> (Lane 2), 1 mM MgGTP (Lane 3), both (Lane 4) or without additions for 2 h at 4°C. Subsequently, the samples were applied to a non-denaturing (Panel A) and SDS polyacrylamide gel (Panel B). Coomassie-staining.



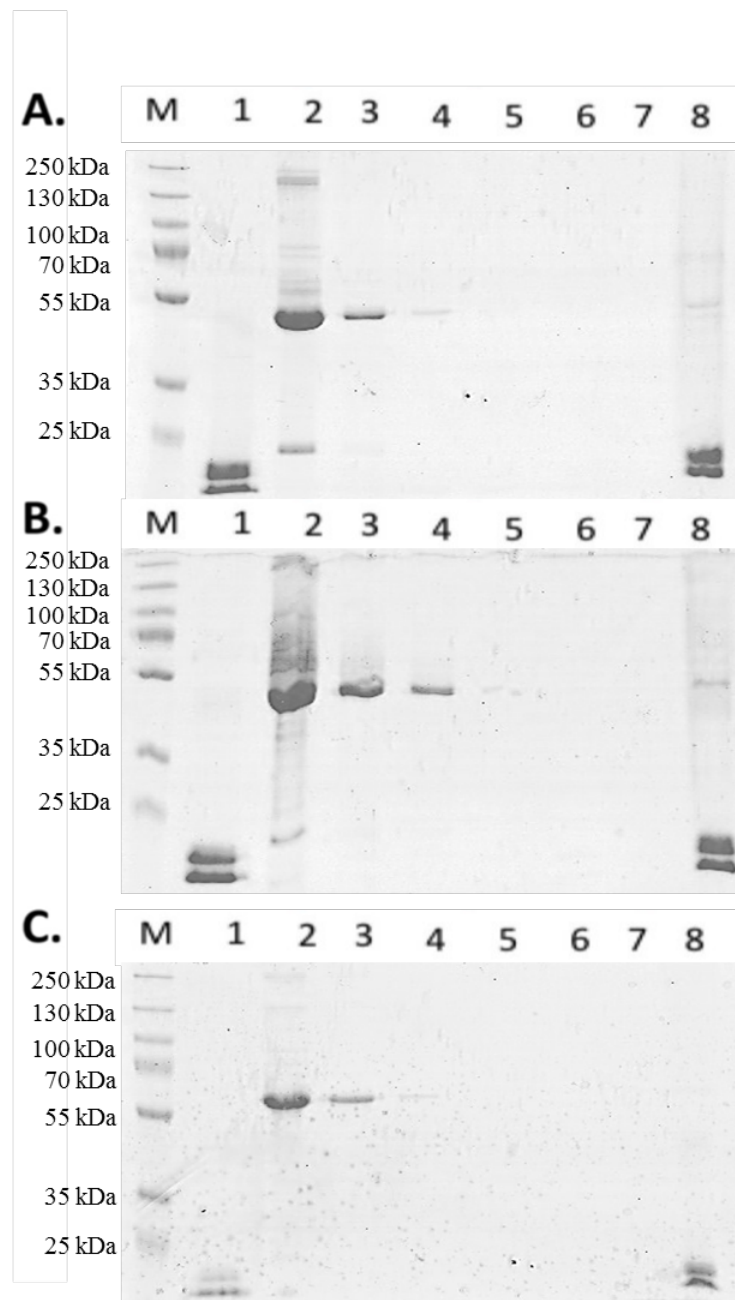

**Supplementary Figure S4. Interaction of CobWs with Zur.** A pull-down assay was performed using magnetic MagStrep XT beads washed three times in buffer W (50 mM TrisHCl, pH 8, 150 mM NaCl) to bind 10  $\mu$ g of Zur-strep-tag for 30 min at 4  $^{\circ}$ C in buffer W (50 mM TrisHCl, pH 8, 150 mM NaCl) additionally containing 500  $\mu$ M MgCl<sub>2</sub> and 100  $\mu$ M ZnCl<sub>2</sub>. The supernatant (Lane 1) was removed and 100  $\mu$ g CobW1-His-tag (Panel A), CobW2-His-tag (Panel B) or CobW3-His-tag (Panel C) were added. The mixture was incubated for 3 h at 4  $^{\circ}$ C. Again, the supernatant was removed (Lane 2) and the beads washed with buffer W five times (Lanes 3 to 7). Finally, the bound proteins were removed using two-fold concentrated SDS sample buffer (Lane 8). The Panels show Coomassie-stained SDS polyacrylamide gels

## Supplementary Literature

1. **Herzberg M, Bauer L, and Nies DH.** 2014. Deletion of the *zupT* gene for a zinc importer influences zinc pools in *Cupriavidus metallidurans* CH34. *Metallomics* **6**:421-436.
2. **Scherer J, and Nies DH.** 2009. CzcP is a novel efflux system contributing to transition metal resistance in *Cupriavidus metallidurans* CH34. *Mol Microbiol* **73**:601-621.
3. **Munkelt D, Grass G, and Nies DH.** 2004. The chromosomally encoded cation diffusion facilitator proteins DmeF and FieF from *Wautersia metallidurans* CH34 are transporters of broad metal specificity. *J Bacteriol* **186**:8036-8043.
4. **Grass G, Otto M, Fricke B, Haney CJ, Rensing C, Nies DH, and Munkelt D.** 2005. FieF (YiiP) from *Escherichia coli* mediates decreased cellular accumulation of iron and relieves iron stress. *Arch Microbiol* **183**:9-18.
5. **Herzberg M, Bauer L, Kirsten A, and Nies DH.** 2016. Interplay between seven secondary metal transport systems is required for full metal resistance of *Cupriavidus metallidurans*. *Metallomics* **8**:313-326.
6. **Grosse C, Herzberg M, Schüttau M, and Nies DH.** 2016. Characterization of the  $\Delta 7$  mutant of *Cupriavidus metallidurans* with deletions of seven secondary metal uptake systems. *mSystems* **1**:e00004-16.
7. **Abelson PH, and Aldous E.** 1950. Ion antagonisms in microorganisms - interference of normal magnesium metabolism by nickel, cobalt, cadmium, zinc, and manganese. *J Bacteriol* **60**:401-413.
8. **Lunin V, Dobrovetsky E, Khutoreskaya G, Zhang R, Joachimiak A, Doyle DA, Bochkarev A, Maguire ME, Edwards AM, and Koth CM.** 2006. Crystal structure of the CorA Mg<sup>2+</sup> transporter. *Nature* **440**:833-837.
9. **Schneider CA, Rasband WS, and Eliceiri KW.** 2012. NIH image to ImageJ: 25 years of image analysis. *Nat Methods* **9**:671-675.
10. **Simon R, Priefer U, and Pühler A.** 1983. A broad host range mobilization system for in vivo genetic engineering: transposon mutagenesis in Gram-negative bacteria. *Bio/Technology* **1**:784 - 791.
11. **Marx CJ, and Lidstrom ME.** 2002. Broad-host-range *cre-lox* system for antibiotic marker recycling in gram-negative bacteria. *Biotechniques*. **33**:1062-1067.
12. **Berg Svd, Löfdahl PA, Härd T, and Berglund H.** 2006. Improved solubility of TEV protease by directed evolution. *J Biotechnol* **121**:291-298.
13. **Legatzki A, Anton A, Grass G, Rensing C, and Nies DH.** 2003. Interplay of the Czc-system and two P-type ATPases in conferring metal resistance to *Ralstonia metallidurans*. *J Bacteriol* **185**:4354–4361.

14. **Herzberg M, Schütttau M, Reimers M, Grosse C, Schlegel HG, and Nies DH.** 2015. Synthesis of nickel-iron hydrogenase in *Cupriavidus metallidurans* is controlled by metal-dependent silencing and un-silencing of genomic islands. *Metallomics* **7**:632 - 649.
15. **Bütöf L, Schmidt-Vogler C, Herzberg M, Große C, and Nies DH.** 2017. The components of the unique Zur regulon of *Cupriavidus metallidurans* mediate cytoplasmic zinc handling. *J Bacteriol* **199**:e00372-17, spotlight article.
16. **Schmidt C, Schwarzenberger C, Grosse C, and Nies DH.** 2014. FurC regulates expression of *zupT* for the central zinc importer ZupT of *Cupriavidus metallidurans*. *J Bacteriol* **196**:3461-3471.
17. **Mergeay M, Nies D, Schlegel HG, Gerits J, Charles P, and van Gijsegem F.** 1985. *Alcaligenes eutrophus* CH34 is a facultative chemolithotroph with plasmid-bound resistance to heavy metals. *J Bacteriol* **162**:328-334.
18. **Kirsten A, Herzberg M, Voigt A, Seravalli J, Grass G, Scherer J, and Nies DH.** 2011. Contributions of five secondary metal uptake systems to metal homeostasis of *Cupriavidus metallidurans* CH34. *J Bacteriol* **193**:4652-4663.
